# Supplementary material for: Proteins Involved in Synaptic Plasticity Are Downregulated in the Cerebrospinal Fluid of Infants With Clinical Sepsis Complicated by Neuroinflammation
Source: Front Cell Neurosci. 2022 May 11;16:887212. doi: 10.3389/fncel.2022.887212 (PMC9130476; doi:10.3389/fncel.2022.887212)
Supplement: Supplementary file 2 [file Table_2.XLSX]

## Sheet: SourceData_CSFproteomics
LFQ intensity 1	LFQ intensity 10	LFQ intensity 11	LFQ intensity 12	LFQ intensity 13	LFQ intensity 14	LFQ intensity 15	LFQ intensity 16	LFQ intensity 17	LFQ intensity 18	LFQ intensity 19	LFQ intensity 2	LFQ intensity 20	LFQ intensity 21	LFQ intensity 22	LFQ intensity 23	LFQ intensity 24	LFQ intensity 25	LFQ intensity 26	LFQ intensity 27	LFQ intensity 28	LFQ intensity 29	LFQ intensity 3	LFQ intensity 4	LFQ intensity 5	LFQ intensity 6	LFQ intensity 7	LFQ intensity 8	LFQ intensity 9	Only identified by site	Reverse	Potential contaminant	KEGG name	Peptides	Unique peptides	Sequence coverage [%]	Unique + razor sequence coverage [%]	Unique sequence coverage [%]	Mol. weight [kDa]	Q-value	Score	Intensity	MS/MS count	Protein IDs	Majority protein IDs	Protein names	Gene names	id	UniProt names
#!{Type}E	E	E	E	E	E	E	E	E	E	E	E	E	E	E	E	E	E	E	E	E	E	E	E	E	E	E	E	E	C	C	C	C	N	N	N	N	N	N	N	N	N	N	T	T	T	T	T	T
59752001536	40133001216	48873000960	38656000000	41969999872	63497998336	42258001920	42737000448	65571999744	42124001280	74741997568	75724996608	36517998592	60596998144	82438995968	52020998144	60195999744	48873000960	33290000384	30912999424	49849999360	37067001856	43996000256	63537000448	62208000000	44799000576	70244999168	41975001088	14512000000					12	12	69.4	69.4	69.4	15.887	0	323.31	3346300000000	2825	P02766;A0A087WT59	P02766;A0A087WT59	Transthyretin	TTR	17	A0A087WT59_HUMAN;TTHY_HUMAN
385840000	610659968	489230016	469409984	410720000	405990016	485129984	382409984	224990000	364470016	399670016	301880000	486729984	352630016	306889984	270769984	470169984	535440000	135790000	123560000	520380000	438550016	472620000	342960000	494809984	453849984	440800000	540259968	171480000				Amoebiasis;ECM-receptor interaction;Focal adhesion;Protein digestion and absorption	23	23	21.7	21.7	21.7	129.31	0	323.31	24652000000	440	P08123;A0A087WTA8	P08123;A0A087WTA8	Collagen alpha-2(I) chain	COL1A2	20	A0A087WTA8_HUMAN;CO1A2_HUMAN
262030000	303140000	262160000	680520000	550680000	474320000	732360000	523640000	563689984	577779968	392249984	336409984	644009984	220230000	594609984	519329984	570710016	681040000	331040000	166600000	700849984	440880000	365310016	435809984	670270016	553710016	566960000	726920000	92845000					21	0	33.4	33.4	0	93.329	0	323.31	23201000000	397	A0A087WTF6;A0A087WX77;A0A087WV75	A0A087WTF6;A0A087WX77;A0A087WV75		NCAM1	21	A0A087WTF6_HUMAN;A0A087WV75_HUMAN;A0A087WX77_HUMAN
59592000	0	63894000	39619000	43637000	44999000	72078000	69425000	32068000	43557000	46054000	61073000	56545000	0	40181000	47538000	48286000	41699000	0	0	76835000	55634000	82700000	33842000	70500000	63996000	47824000	67931000	0				Axon guidance	14	12	12.9	12.9	11.4	180.93	0	174.22	1328600000	145	Q9Y6N7;A0A087WTM1;A0A087WZ85;A0A0A0MSX4;H7C4Y7	Q9Y6N7;A0A087WTM1;A0A087WZ85;A0A0A0MSX4	Roundabout homolog 1	ROBO1	23	A0A087WTM1_HUMAN;A0A087WZ85_HUMAN;A0A0A0MSX4_HUMAN;ROBO1_HUMAN
60552000	0	0	162430000	210770000	99627000	278360000	142930000	139950000	149440000	92034000	0	190840000	0	133700000	173590000	113620000	153580000	79788000	0	168120000	208250000	105040000	0	174280000	135680000	0	198060000	0					13	13	20.9	20.9	20.9	99.133	0	152.34	3569500000	163	A0A087WYL5;Q6UXD5;H3BN26	A0A087WYL5;Q6UXD5;H3BN26	Seizure 6-like protein 2	SEZ6L2	38	A0A087WYL5_HUMAN;H3BN26_HUMAN;SE6L2_HUMAN
364540000	146820000	203160000	348990016	166580000	247310000	196210000	230090000	222580000	269440000	221080000	333540000	163050000	147950000	203910000	196910000	224100000	164810000	0	23777000	223810000	164200000	197740000	160750000	222100000	180170000	215710000	203710000	88097000				ECM-receptor interaction;Focal adhesion;Protein digestion and absorption	25	25	34.7	34.7	34.7	108.53	0	323.31	13461000000	444	P12109;A0A087X0S5	P12109;A0A087X0S5	Collagen alpha-1(VI) chain	COL6A1	44	A0A087X0S5_HUMAN;CO6A1_HUMAN
142650000	112010000	148020000	247840000	242220000	164620000	293100000	220250000	158980000	174510000	98679000	148380000	211760000	0	176280000	251790000	189670000	203550000	128470000	0	211200000	220120000	184930000	0	223120000	117260000	155390000	211430000	0				Cell adhesion molecules (CAMs)	9	9	33.7	33.7	33.7	48.509	0	199.5	4664300000	129	Q9BY67;A0A087X0T8;A0A087X1W8;A0A0A0MTJ8;X5DQS5;F5H125;F5H8J9;H0YG94;F5H0H5	Q9BY67;A0A087X0T8;A0A087X1W8;A0A0A0MTJ8;X5DQS5	Cell adhesion molecule 1	CADM1	45	A0A087X0T8_HUMAN;A0A087X1W8_HUMAN;A0A0A0MTJ8_HUMAN;CADM1_HUMAN;X5DQS5_HUMAN
650230016	137600000	103540000	1135200000	187050000	1155299968	347280000	165210000	867910016	713449984	636430016	493280000	444070016	770099968	1195699968	473550016	854169984	0	0	0	597160000	0	304489984	474380000	342260000	513760000	609840000	321360000	0				Complement and coagulation cascades	25	22	13.6	13.6	12	251.7	0	320.96	10938000000	172	P12259;A0A0A0MRJ7	P12259;A0A0A0MRJ7	Coagulation factor V;Coagulation factor V heavy chain;Coagulation factor V light chain	F5	59	A0A0A0MRJ7_HUMAN;FA5_HUMAN
13217000448	44578000896	40413999104	15640999936	33508999168	16382999552	36815998976	49382998016	18648000512	35086000128	27380000768	14958999552	54429999104	36643999744	26741000192	46002999296	25948000256	50098999296	20067000320	30602000384	38634999808	46008999936	13843000320	45558001664	38719000576	56527998976	24302999552	48974000128	76075999232					26	15	70	70	47.6	36.105	0	323.31	2484400000000	1901	P01857;A0A0A0MS08;A0A0A0MS07	P01857;A0A0A0MS08;A0A0A0MS07	Ig gamma-1 chain C region	IGHG1	62	A0A0A0MS07_HUMAN;A0A0A0MS08_HUMAN;IGHG1_HUMAN
87394000	43884000	0	121920000	150600000	116400000	114240000	179200000	134240000	76594000	145510000	0	135350000	63020000	117980000	117040000	121600000	213890000	82106000	0	170680000	149550000	0	0	158920000	156390000	165580000	179430000	0					5	5	17.8	17.8	17.8	49.347	0	233.26	3022400000	106	Q96B86;A0A0A0MTQ4;F5H7G2;G3V4C2	Q96B86;A0A0A0MTQ4;F5H7G2	Repulsive guidance molecule A	RGMA	71	A0A0A0MTQ4_HUMAN;F5H7G2_HUMAN;RGMA_HUMAN
196080000	879870016	1406000000	0	1604499968	943329984	1017699968	1636800000	666760000	999299968	1255399936	0	1633299968	609929984	889750016	1832600064	390809984	1766800000	1187800064	1199000064	1026300032	1224000000	0	1932000000	286040000	1449200000	0	2180400128	1917699968					9	4	46.7	19.6	19.6	23.063	0	128.78	30064000000	278	B9A064;A0A0B4J231;A0A5H1ZRQ4;P0CG04	B9A064;A0A0B4J231;A0A5H1ZRQ4;P0CG04	Immunoglobulin lambda-like polypeptide 5;Ig lambda-1 chain C regions	IGLL5;IGLC1	80	A0A0B4J231_HUMAN;IGLL5_HUMAN;LAC1_HUMAN
223750000	126650000	369209984	672590016	725340032	677900032	680979968	682800000	639390016	598009984	505160000	349310016	678400000	212690000	618969984	654369984	580710016	776270016	231880000	148570000	646360000	647320000	339449984	320640000	600329984	493230016	513969984	653219968	49626000					25	25	53.9	53.9	53.9	71.42	0	323.31	34692000000	583	Q9NQ79;A0A0C4DFP6;Q5T4F6	Q9NQ79;A0A0C4DFP6;Q5T4F6	Cartilage acidic protein 1	CRTAC1	84	A0A0C4DFP6_HUMAN;CRAC1_HUMAN;Q5T4F6_HUMAN
228050000	317260000	184860000	207960000	147260000	215500000	94892000	131460000	181610000	122010000	136200000	127930000	168520000	252010000	197210000	183280000	173440000	0	203110000	192780000	106290000	127370000	135660000	178520000	0	175250000	164320000	113620000	215930000				Complement and coagulation cascades;Staphylococcus aureus infection;Systemic lupus erythematosus	28	7	46.5	15.8	15.8	83.267	0	323.31	4448300000	115	P06681;A0A0G2JL69;B4DQI1;A0A0G2JIE7;H0Y3H6;E9PDZ0;A0A0G2JK28;H0Y868;Q8N6L6	P06681;A0A0G2JL69;B4DQI1;A0A0G2JIE7;H0Y3H6;E9PDZ0	Complement C2;Complement C2b fragment;Complement C2a fragment	C2	105	B4DQI1_HUMAN;CO2_HUMAN;E9PDZ0_HUMAN;H0Y3H6_HUMAN
339120000	325150016	245060000	498870016	376520000	377920000	341840000	289860000	481350016	366649984	423020000	437070016	337329984	298940000	476260000	354100000	400620000	347190016	179860000	254900000	365440000	274600000	274769984	496940000	405569984	311200000	408230016	410060000	203280000				Complement and coagulation cascades	22	22	43.5	43.5	43.5	75.122	0	323.31	15799000000	414	P07225;A0A3B3ISJ1;A0A0S2Z4L3;G5E9F8;A0A3B3IRK9;A0A3B3IUA6;C9K0R0;CON__P07224	P07225;A0A3B3ISJ1;A0A0S2Z4L3;G5E9F8;A0A3B3IRK9	Vitamin K-dependent protein S	PROS1	116	G5E9F8_HUMAN;PROS_HUMAN
59197000	113150000	0	71658000	0	84816000	68969000	31643000	51947000	62520000	74341000	54521000	43751000	71896000	85571000	60729000	65525000	41345000	0	0	71298000	41102000	27428000	54938000	63571000	127470000	61486000	59626000	0				ko05152;Lysosome	15	15	48.3	48.3	48.3	44.552	0	195.47	1679700000	136	P07339;A0A1B0GV23;A0A1B0GVD5;A0A1B0GWE8;C9JH19;F8W787;A0A1B0GW44;A0A1B0GVP3;A0A1B0GU92;A0A1B0GU03;F8WD96;H7C469;A0A1B0GVF1	P07339;A0A1B0GV23;A0A1B0GVD5;A0A1B0GWE8;C9JH19;F8W787;A0A1B0GW44;A0A1B0GVP3;A0A1B0GU92;A0A1B0GU03;F8WD96;H7C469	Cathepsin D;Cathepsin D light chain;Cathepsin D heavy chain	CTSD	121	C9JH19_HUMAN;CATD_HUMAN;F8W787_HUMAN;F8WD96_HUMAN;H7C469_HUMAN
183130000	14038000	94423000	190140000	209490000	145100000	309969984	182390000	181650000	160760000	145040000	154120000	193770000	48890000	177490000	137010000	127340000	228480000	30092000	7297000	236850000	167320000	179470000	98526000	219740000	174470000	157470000	261000000	0				Cell adhesion molecules (CAMs)	34	25	32.4	32.4	23.7	161.88	0	323.31	10881000000	514	Q9ULB1;A0A1D5RMU6;E7ERL8;A0A0R4J2G7;A0A0U1RRK7;A0A0D9SFF4;A0A0D9SF07;A0A0D9SF36;A0A0U1RQP8;A0A0D9SEQ7;E7EQN4;A0A6Q8PFA2;A0A1B0GVF4;A0A0D9SG60;A0A1B0GU94	Q9ULB1;A0A1D5RMU6;E7ERL8;A0A0R4J2G7;A0A0U1RRK7	Neurexin-1	NRXN1	125	E7ERL8_HUMAN;NRX1A_HUMAN
43770000	0	39908000	74607000	35067000	50655000	75442000	48998000	57560000	46999000	61651000	35056000	118430000	0	76528000	32949000	92491000	46834000	0	0	81559000	37887000	50003000	56349000	55133000	60834000	56900000	35087000	0				Cell adhesion molecules (CAMs)	19	19	27.8	27.8	27.8	113.39	0	273.04	2099500000	184	Q02246;A0A1W2PQ11;A0A1W2PQ86;A0A1B0GTL7;A0A1W2PQJ4;A0A1W2PR60;A0A1W2PPQ9	Q02246;A0A1W2PQ11;A0A1W2PQ86;A0A1B0GTL7;A0A1W2PQJ4	Contactin-2	CNTN2	128	CNTN2_HUMAN
653649984	3781299968	2263500032	1707800064	1479800064	958400000	3545999872	2264800000	1493699968	1248899968	2539899904	1116800000	4150200064	3344399872	1204499968	3634400000	1981600000	3250400000	1611600000	1913500032	2688800000	2210200064	799529984	2878299904	2232100096	1915900032	1312700032	2512199936	4663000064					17	6	56	30.2	30.2	41.287	0	323.31	103440000000	409	P01860;A0A286YES1;A0A4W9A917	P01860;A0A286YES1;A0A4W9A917	Ig gamma-3 chain C region	IGHG3	130	IGHG3_HUMAN
4946800128	7797799936	18498000896	1844400000	14248999936	6689800192	10641000448	16037000192	8671200256	11569999872	11084999680	3817799936	17031000064	11749000192	9613299712	11233000448	3967099904	16636999680	7167699968	13264000000	14261999616	13016999936	4748199936	28788000768	14106999808	17905999872	9523300352	6547700224	28331999232					18	8	68.4	54	39.9	35.9	0	323.31	451650000000	980	P01859;A0A286YEY4	P01859;A0A286YEY4	Ig gamma-2 chain C region	IGHG2	132	IGHG2_HUMAN
1367800064	789630016	13198000128	1837299968	5640099840	3142000128	1191699968	7686799872	2477299968	8893400064	3308400128	883040000	5500100096	2305299968	1793400064	3660800000	308040000	4623499776	1734599936	3235800064	5232900096	10558000128	1520999936	2855399936	1934700032	6272300032	2144999936	5141799936	5367499776					16	8	59.9	32.1	32.1	35.94	0	323.31	111360000000	390	P01861;A0A286YFJ8	P01861;A0A286YFJ8	Ig gamma-4 chain C region	IGHG4	133	IGHG4_HUMAN
822940032	1662700032	1073900032	1201600000	2398000128	1207699968	1238200064	1509299968	1103200000	1700999936	1755500032	941800000	2269499904	2355000064	1240300032	2277299968	2224399872	2831500032	1646599936	1823399936	3932199936	2282500096	997539968	2090800000	1607299968	3354500096	1040600000	2634200064	3419399936					3	3	53.7	53.7	53.7	11.842	0	323.31	36410000000	232	A0A2Q2TTZ9;P01594;P01593	A0A2Q2TTZ9;P01594;P01593	Ig kappa chain V-I region AU;Ig kappa chain V-I region AG		134	KV101_HUMAN;KV102_HUMAN
184470000	219610000	0	342529984	340480000	0	327990016	317950016	324900000	443900000	330580000	153940000	453390016	0	0	433750016	713980032	542560000	245760000	149990000	252500000	224510000	0	0	194670000	390710016	401369984	279780000	0				Complement and coagulation cascades;Hematopoietic cell lineage	4	4	25	25	25	14.177	0	37.293	5293300000	86	P13987;E9PNW4;A0A2U3TZL5;H0YET2	P13987;E9PNW4;A0A2U3TZL5;H0YET2	CD59 glycoprotein	CD59	142	CD59_HUMAN;E9PNW4_HUMAN;H0YET2_HUMAN
229460000	290980000	212900000	388870016	406420000	302920000	528480000	371920000	272700000	445440000	299569984	249170000	371280000	384600000	274190016	575009984	368840000	265000000	425520000	247870000	432780000	346310016	170040000	356840000	293640000	314640000	361729984	382790016	220120000				Complement and coagulation cascades;Phagosome;Staphylococcus aureus infection;Systemic lupus erythematosus	31	30	56	56	56	80.173	0	323.31	30429000000	684	A0A3B3ISR2;B4DPQ0;P00736;F5H2D0;A0A3B3ITU4;F5H1V0;F5H6Y3;F5H3N3;F5H1N6;F5GWL0;F5H3A3;H0YFL7	A0A3B3ISR2;B4DPQ0;P00736;F5H2D0;A0A3B3ITU4	Complement C1r subcomponent;Complement C1r subcomponent heavy chain;Complement C1r subcomponent light chain	C1R	147	B4DPQ0_HUMAN;C1R_HUMAN;F5H2D0_HUMAN
63796000	55267000	0	122630000	70050000	113430000	83083000	94570000	90692000	92646000	65643000	0	71966000	56309000	90279000	59410000	81866000	91248000	67574000	0	79119000	68462000	54541000	71366000	0	91666000	68316000	83873000	36442000				ECM-receptor interaction;Focal adhesion	30	30	13.7	13.7	13.7	485.42	0	209.23	2561200000	228	A0A3B3ISX9;P22105;A0A140T9C0;A0A140T902;A0A140T8Y3;A0A140TA52;A0A140TA41;A0A140TA33;A0A140T8Z8;A0A140T9L7;A0A087X0I0;A0A140T956;Q16473;A0A087WWA5;A0A140T923	A0A3B3ISX9;P22105;A0A140T9C0;A0A140T902;A0A140T8Y3;A0A140TA52;A0A140TA41;A0A140TA33;A0A140T8Z8;A0A140T9L7;A0A087X0I0	Tenascin-X	TNXB	149	A0A087X0I0_HUMAN;TENX_HUMAN
164870000	238940000	122840000	375910016	165510000	135360000	182830000	122650000	163670000	205780000	140600000	0	205090000	55071000	197930000	94544000	106330000	184000000	107060000	0	126330000	0	219180000	0	134270000	123320000	95323000	115760000	0				Epithelial cell signaling in Helicobacter pylori infection	17	17	9.8	9.8	9.8	254.58	0	323.31	3872200000	202	P23471;A0A494C1B4;A0A494C0U4;A0A494C055;A0A494C087;A0A494C1R4;A0A494C1H9;A0A494C036;A0A494C1F0	P23471;A0A494C1B4;A0A494C0U4;A0A494C055;A0A494C087;A0A494C1R4;A0A494C1H9;A0A494C036	Receptor-type tyrosine-protein phosphatase zeta	PTPRZ1	156	PTPRZ_HUMAN
118090000	309209984	68548000	100210000	113970000	122940000	189520000	121210000	128530000	0	110930000	129860000	137260000	154230000	60570000	119420000	93071000	151010000	219970000	80744000	211160000	87861000	65677000	88754000	85438000	68972000	83790000	109090000	0					11	11	39.1	39.1	39.1	43.987	0	276.88	4463100000	186	Q9Y279;A0A494C0F5;H7C062	Q9Y279;A0A494C0F5;H7C062	V-set and immunoglobulin domain-containing protein 4	VSIG4	157	H7C062_HUMAN;VSIG4_HUMAN
380790016	228840000	411720000	437449984	695020032	431270016	660889984	648049984	400180000	353209984	624889984	374700000	586720000	106360000	342100000	674140032	517110016	931409984	234020000	73306000	613550016	854540032	446920000	389720000	561379968	369000000	400800000	622910016	135880000				ECM-receptor interaction	10	10	8.4	8.4	8.4	203.09	0	323.31	19105000000	282	A0A494C0G5;O00468;A0A087X208;A0A494C1I6	A0A494C0G5;O00468;A0A087X208;A0A494C1I6	Agrin;Agrin N-terminal 110 kDa subunit;Agrin C-terminal 110 kDa subunit;Agrin C-terminal 90 kDa fragment;Agrin C-terminal 22 kDa fragment	AGRN	158	A0A087X208_HUMAN;AGRIN_HUMAN
52790000	0	0	155120000	146240000	129370000	162560000	129000000	114970000	104780000	90671000	70723000	139870000	47704000	89297000	149460000	114580000	126960000	84463000	52943000	154620000	199380000	93551000	0	195080000	78841000	94557000	172280000	0					10	10	60.1	60.1	60.1	33.456	0	243.22	4627900000	185	Q99674;A0A4W8VYG7;A0A4W8W4R1	Q99674;A0A4W8VYG7;A0A4W8W4R1	Cell growth regulator with EF hand domain protein 1	CGREF1	164	CGRE1_HUMAN
904739968	4091800064	4017499904	905480000	3792100096	2369700096	2518000128	4060199936	2660800000	3156100096	2393799936	0	548689984	4960099840	1668300032	2362700032	1404099968	4421899776	1630200064	2886700032	3708800000	5857099776	1277100032	11073999872	5329600000	4797799936	2379099904	4626299904	9571399680					6	2	67.3	60.4	21.8	11.167	0	201.19	61302000000	173	A0A4W8ZXM2;A0A0B4J1Y9	A0A4W8ZXM2;A0A0B4J1Y9		IGHV3-72	165	A0A0B4J1Y9_HUMAN
0	0	90152000	222790000	118580000	176410000	163600000	162780000	195300000	151850000	179030000	0	112780000	0	129750000	168430000	159510000	133390000	81266000	39228000	204140000	107310000	95140000	60113000	117220000	121250000	113690000	210290000	0					4	4	13	13	13	41.806	0	17.386	2538800000	75	Q9BRK5;G3V1E2;A0A5F9UJX7;A0A5F9UP49;H0Y3T6	Q9BRK5;G3V1E2;A0A5F9UJX7;A0A5F9UP49;H0Y3T6	45 kDa calcium-binding protein	SDF4	167	CAB45_HUMAN;G3V1E2_HUMAN;H0Y3T6_HUMAN
140730000	1298300032	177590000	135410000	136320000	145950000	202440000	135090000	143840000	160440000	107640000	182180000	334340000	143010000	69753000	162890000	163310000	173080000	71310000	83145000	159460000	212140000	146370000	88084000	175930000	113920000	106470000	189610000	0				Cysteine and methionine metabolism;Glycolysis / Gluconeogenesis;Propanoate metabolism;Pyruvate metabolism	17	16	48.8	48.8	45.2	36.638	0	323.31	6599700000	180	P07195;A0A5F9ZHM4;A0A3B3IS95;A8MW50;C9J7H8;F5H793;P07864;Q6ZMR3;F5H5G7;F5H155;A0A087WUM2;G3XAP5;F5H245	P07195;A0A5F9ZHM4;A0A3B3IS95;A8MW50	L-lactate dehydrogenase B chain;L-lactate dehydrogenase	LDHB	172	A8MW50_HUMAN;LDHB_HUMAN
908209984	2444999936	5050500096	1299500032	3449400064	1393299968	3377200128	4391399936	2308100096	6226899968	1627100032	914390016	6231199744	2904800000	2869100032	3836999936	2584100096	3881100032	2357900032	2164600064	4370400256	3271099904	1726400000	5546299904	5498299904	6325000192	5468400128	4950700032	9961499648					4	1	43.1	43.1	23.5	11.043	0	323.31	54114000000	183	A0A5H1ZRS2	A0A5H1ZRS2			175
1472499968	1859900032	1742000000	1656899968	1845400064	2132400000	1456600064	1411399936	2060600064	1820999936	1684499968	1835500032	1829400064	2655699968	2171000064	1970099968	1772000000	1492000000	1701600000	1705799936	1614800000	1327900032	1954099968	1906899968	1179200000	1341799936	1221500032	1298000000	2758200064				Complement and coagulation cascades	20	20	36.2	36.2	36.2	55.154	0	323.31	109480000000	715	P05155;A0A7I2V2D2;H9KV48;E9PGN7;A0A087WUD9;A0A7I2V5R3;A0A7I2V2X2;A0A7I2V4I9;CON__P50448	P05155;A0A7I2V2D2;H9KV48;E9PGN7;A0A087WUD9;A0A7I2V5R3	Plasma protease C1 inhibitor	SERPING1	186	A0A087WUD9_HUMAN;E9PGN7_HUMAN;H9KV48_HUMAN;IC1_HUMAN
50248000	34671000	24144000	48901000	33503000	37985000	54806000	46113000	43460000	47573000	36168000	49772000	40607000	0	0	45085000	37438000	45247000	26196000	40353000	42845000	42279000	41925000	38897000	51935000	38619000	36126000	52519000	20842000				Amoebiasis;ECM-receptor interaction;Focal adhesion;Pathways in cancer;Small cell lung cancer;Toxoplasmosis	12	9	10.4	10.4	7.8	198.04	0	141.02	1077600000	127	P07942;G3XAI2;A0A7I2V5X5;A0A7I2V4J9;A0A7I2V3J7;A0A7I2V3I5;A0A7I2V682;A0A7I2V2T9;E7EPA6;A0A7I2V2R2;A0A7I2V407;A0A7I2V2J0;A0A7I2V5R0;A0A7I2V5T9	P07942;G3XAI2;A0A7I2V5X5;A0A7I2V4J9;A0A7I2V3J7;A0A7I2V3I5;A0A7I2V682;A0A7I2V2T9	Laminin subunit beta-1	LAMB1	195	G3XAI2_HUMAN;LAMB1_HUMAN
4042200064	3859300096	3946800128	2355599872	2872000000	2415699968	2349799936	3025200128	2546599936	1650200064	3483599872	8668199936	2818400000	2783399936	3625600000	2069600000	2438700032	3104199936	3206700032	3003899904	2448199936	2502299904	7746999808	4827200000	2635500032	3520999936	3021700096	2708699904	3086400000				Hypertrophic cardiomyopathy (HCM);Renin-angiotensin system;Vascular smooth muscle contraction	23	23	54.6	54.6	54.6	53.154	0	323.31	179890000000	714	P01019;A0A7P0TBH1;A0A7P0T8D1;A0A7P0TA52;A0A7P0T9S6;A0A7P0TAP4;A0A7P0Z441	P01019;A0A7P0TBH1;A0A7P0T8D1;A0A7P0TA52;A0A7P0T9S6;A0A7P0TAP4;A0A7P0Z441	Angiotensinogen;Angiotensin-1;Angiotensin-2;Angiotensin-3;Angiotensin-4;Angiotensin 1-9;Angiotensin 1-7;Angiotensin 1-5;Angiotensin 1-4	AGT	203	ANGT_HUMAN
0	196650000	281200000	323529984	397950016	172760000	464270016	363920000	419510016	457230016	359000000	0	237960000	200960000	429350016	433060000	448860000	525689984	127250000	0	353689984	356680000	187580000	247000000	454630016	387150016	288400000	493329984	0				Prion diseases	7	7	35.2	35.2	35.2	27.661	0	126.84	8309100000	123	P04156;A2A2V1;X6RKS3	P04156;A2A2V1;X6RKS3	Major prion protein	PRNP	212	A2A2V1_HUMAN;PRIO_HUMAN;X6RKS3_HUMAN
0	0	0	236710000	211470000	296649984	267450000	177310000	148400000	189860000	210350000	0	222700000	0	187250000	256440000	171750000	251960000	0	0	200470000	311840000	174410000	51372000	40244000	135870000	105650000	205360000	0					8	8	35.1	35.1	35.1	30.297	0	156.27	3061600000	125	A6NLU5	A6NLU5	V-set and transmembrane domain-containing protein 2B	VSTM2B	219	VTM2B_HUMAN
660870016	620380032	657369984	775150016	856680000	1137400064	784409984	821480000	790089984	683459968	954689984	844489984	666369984	674009984	735840000	871870016	963409984	646889984	620590016	452329984	1033200000	744510016	623249984	785660032	880329984	715379968	1076499968	870140032	274329984					21	5	38.1	10.7	10.7	78.329	0	323.31	25125000000	237	B1AHL2	B1AHL2	Fibulin-1	FBLN1	227	B1AHL2_HUMAN
1434800000	1479100032	1190099968	1345600000	938689984	2377700096	672640000	926950016	1826099968	1185100032	1690200064	2710599936	916780032	2718799872	1969299968	1208600064	1694200064	740640000	1913699968	2746800128	717820032	616049984	1947600000	1166200064	619320000	885809984	1495100032	621009984	2281999872				Complement and coagulation cascades;Staphylococcus aureus infection	61	4	53.2	53.2	5.1	140.94	0	323.31	173100000000	1330	B4E1Z4;P00751;A0A0G2JH38;H7C5H1;C9JRT3;A0A0G2JHM4;A0A0G2JJ82;H7C526;A0A0G2JI59;C9JYQ5;A2ABG0;F2Z3N2	B4E1Z4;P00751	Complement factor B;Complement factor B Ba fragment;Complement factor B Bb fragment	CFB	239	B4E1Z4_HUMAN;CFAB_HUMAN
646280000	333340000	0	705720000	607240000	428409984	502780000	732880000	546640000	523620000	265640000	0	826940032	0	759960000	557859968	727800000	853049984	451430016	165250000	794499968	747920000	406960000	0	0	728870016	522369984	763440000	0					6	6	38.6	38.6	38.6	25.833	0	310.84	10020000000	93	Q8TAG5;B5MCX6;F8W8J5	Q8TAG5;B5MCX6;F8W8J5	V-set and transmembrane domain-containing protein 2A	VSTM2A	242	B5MCX6_HUMAN;F8W8J5_HUMAN;VTM2A_HUMAN
1905400064	486760000	1850000000	2350700032	2157700096	1728999936	2699500032	1959900032	2185700096	1931500032	1543900032	1737200000	2327000064	606409984	1949799936	2071600000	1820400000	2582700032	1031000000	524529984	2805100032	2130200064	2000400000	1300099968	2926299904	2225100032	1777699968	2807800064	468820000					27	18	42.5	42.5	28.8	72.176	0	323.31	156020000000	921	P51693;F5GZ08;B7Z4G8;K7EQJ4;S4R3U6;K7ELK0	P51693;F5GZ08;B7Z4G8	Amyloid-like protein 1;C30	APLP1	244	APLP1_HUMAN;B7Z4G8_HUMAN;F5GZ08_HUMAN
863880000	563270016	697960000	341190016	276009984	453700000	131100000	277489984	404009984	277350016	398230016	985489984	298310016	850880000	710259968	318430016	411409984	330060000	819590016	989230016	246700000	267230000	983260032	874510016	267910000	474289984	327660000	200350000	1036800000					33	10	44.8	44.8	11.9	103.36	0	323.31	37257000000	625	Q14624;B7ZKJ8;CON__Q3T052	Q14624;B7ZKJ8	Inter-alpha-trypsin inhibitor heavy chain H4;70 kDa inter-alpha-trypsin inhibitor heavy chain H4;35 kDa inter-alpha-trypsin inhibitor heavy chain H4	ITIH4	247	B7ZKJ8_HUMAN;ITIH4_HUMAN
308110016	0	529310016	534720000	401670016	370830016	466200000	475209984	204380000	431060000	329089984	370569984	515470016	166910000	234190000	396280000	343750016	573510016	330680000	0	375510016	780590016	589480000	198830000	562809984	352969984	423660000	561849984	113710000					13	13	20	20	20	111.78	0	323.31	14141000000	188	Q9BYH1;B7ZLJ8;B0QYH5;B0QYH4	Q9BYH1;B7ZLJ8;B0QYH5;B0QYH4	Seizure 6-like protein	SEZ6L	249	B0QYH4_HUMAN;B0QYH5_HUMAN;B7ZLJ8_HUMAN;SE6L1_HUMAN
754390016	1232600064	662830016	1586700032	2090800000	824830016	2077699968	1199699968	2476600064	1038200000	1038099968	1526899968	1336000000	1233100032	2062899968	1705699968	1558200064	1240300032	2995200000	1753400064	971009984	1096700032	727360000	1996800000	1297699968	1359600000	1988300032	1265900032	555889984					12	12	35.3	35.3	35.3	24.158	0	323.31	67105000000	410	C9JF17;P05090;C9JX71;F8WBT9	C9JF17;P05090	Apolipoprotein D	APOD	271	APOD_HUMAN;C9JF17_HUMAN
31343000	355180000	0	89628000	114800000	0	76518000	59790000	98765000	77615000	63491000	367720000	97172000	188620000	41875000	131870000	51787000	83834000	722289984	104350000	75347000	81113000	66090000	49888000	86537000	0	0	0	77771000					25	25	33.3	33.3	33.3	125.45	0	323.31	4979100000	226	Q86VB7;F5GZZ9;C9JHR8;H0YGZ7	Q86VB7;F5GZZ9;C9JHR8	Scavenger receptor cysteine-rich type 1 protein M130;Soluble CD163	CD163	273	C163A_HUMAN;C9JHR8_HUMAN;F5GZZ9_HUMAN
267090000	405670016	350350016	364040000	424129984	458700000	634369984	347180000	444969984	262010000	436750016	0	687790016	0	547809984	315480000	457049984	524089984	241580000	0	519129984	355040000	359260000	284520000	343990016	310820000	244670000	227730000	0				Lysosome	10	10	19.7	19.7	19.7	58.112	0	65.088	7859500000	120	P07602;C9JIZ6;Q5BJH1;A0A0J9YXB8	P07602;C9JIZ6;Q5BJH1	Prosaposin;Saposin-A;Saposin-B-Val;Saposin-B;Saposin-C;Saposin-D	PSAP	274	C9JIZ6_HUMAN;Q5BJH1_HUMAN;SAP_HUMAN
399169984	206790000	350540000	710480000	691420032	529920000	855809984	703350016	545680000	595590016	388190016	386400000	830470016	151240000	589520000	697630016	646489984	705080000	265140000	111680000	786200000	702979968	566430016	276369984	742489984	608870016	461420000	818920000	64116000				Cell adhesion molecules (CAMs)	36	36	41.4	41.4	41.4	143.89	0	323.31	58547000000	916	Q92823;C9JYY6;F8W775;A0A087X2B3;C9JH43;C9JF43;C9J8B6;C9JUR7	Q92823;C9JYY6;F8W775;A0A087X2B3	Neuronal cell adhesion molecule	NRCAM	278	A0A087X2B3_HUMAN;C9JYY6_HUMAN;F8W775_HUMAN;NRCAM_HUMAN
282710016	304240000	225560000	691889984	563110016	726030016	662979968	531049984	508340000	653089984	680080000	197040000	552550016	555680000	499120000	942300032	619560000	365369984	763000000	274740000	355729984	309980000	189910000	314440000	332240000	393870016	404129984	437649984	306380000				Chagas disease (American trypanosomiasis);Complement and coagulation cascades;Prion diseases;Staphylococcus aureus infection;Systemic lupus erythematosus	9	9	44.7	44.7	44.7	26.721	0	156.71	14797000000	230	P02746;D6R934;A0A0A0MSV6;D6RGJ1	P02746;D6R934;A0A0A0MSV6	Complement C1q subcomponent subunit B	C1QB	313	A0A0A0MSV6_HUMAN;C1QB_HUMAN;D6R934_HUMAN
139970000	97053000	161600000	210290000	254390000	165360000	281129984	244480000	0	101770000	141190000	154980000	296520000	0	157600000	152820000	142030000	0	100890000	0	0	207060000	0	188710000	238490000	157650000	0	262890000	0				Protein processing in endoplasmic reticulum	11	11	41.3	41.3	41.3	40.228	0	258.89	4532000000	131	Q12907;D6RBV2;D6RDX1;D6RIU4;D6RBH1	Q12907;D6RBV2;D6RDX1;D6RIU4	Vesicular integral-membrane protein VIP36	LMAN2	320	D6RBV2_HUMAN;D6RDX1_HUMAN;D6RIU4_HUMAN;LMAN2_HUMAN
5010699776	3604999936	4020999936	2025400064	2553400064	3395699968	1733100032	3013799936	3075300096	2339699968	3500100096	4837499904	1953299968	5452800000	3915200000	2063500032	3475300096	2743699968	3308100096	3465600000	2230000128	2629600000	5053899776	3764600064	1690400000	2742799872	2730200064	2447399936	3589400064					38	38	77.6	77.6	77.6	52.917	0	323.31	385860000000	1703	P02774;D6RF35;D6RBJ7;D6RF20;CON__Q3MHN5;CON__ENSEMBL:ENSBTAP00000018229	P02774;D6RF35;D6RBJ7	Vitamin D-binding protein	GC	325	D6RBJ7_HUMAN;D6RF35_HUMAN;VTDB_HUMAN
0	0	59755000	122820000	85530000	85194000	125940000	143280000	68741000	77491000	75498000	44667000	141230000	0	57527000	74579000	61226000	140260000	0	0	128940000	96498000	76777000	0	95539000	68648000	57611000	140660000	0					11	10	20.1	20.1	18.9	88.308	0	265.99	2358700000	183	P55285;D6RF86	P55285;D6RF86	Cadherin-6	CDH6	326	CADH6_HUMAN;D6RF86_HUMAN
135360000	148030000	158260000	298480000	195110000	247160000	255300000	228840000	238080000	249160000	296390016	218520000	264670000	129900000	195710000	328369984	280860000	226210000	105550000	85727000	247100000	281960000	145420000	166660000	272560000	232880000	245540000	242790000	110100000				ECM-receptor interaction;Focal adhesion;Protein digestion and absorption	46	46	26.3	26.3	26.3	278.11	0	323.31	12334000000	498	E7ENL6;P12111;C9JNG9	E7ENL6;P12111	Collagen alpha-3(VI) chain	COL6A3	342	CO6A3_HUMAN;E7ENL6_HUMAN
335880000	367390016	304140000	276180000	337380000	363729984	235830000	261370000	261160000	254310000	352460000	477550016	300280000	576990016	356830016	276240000	358840000	212090000	395729984	457420000	261620000	211500000	364420000	327929984	244170000	349160000	241080000	250220000	428860000				Complement and coagulation cascades;Staphylococcus aureus infection	20	20	43.6	43.6	43.6	65.75	0	323.31	16995000000	387	P05156;G3XAM2;E7ETH0;A0A2R8Y3M9;D6R9Z8;CON__Q32PI4	P05156;G3XAM2;E7ETH0;A0A2R8Y3M9	Complement factor I;Complement factor I heavy chain;Complement factor I light chain	CFI	347	CFAI_HUMAN;E7ETH0_HUMAN;G3XAM2_HUMAN
371169984	259190000	245360000	595230016	448230016	788720000	376510016	263150000	624510016	564300032	466569984	308860000	327240000	444230016	665409984	335369984	641769984	467360000	171490000	159240000	581889984	334710016	210550000	279040000	370790016	424520000	476360000	520310016	21642000				Ether lipid metabolism	38	38	54.3	54.3	54.3	98.993	0	323.31	47680000000	1065	Q13822;E7EUF1;E5RIA2;E5RJ49;E5RIB9	Q13822;E7EUF1;E5RIA2	Ectonucleotide pyrophosphatase/phosphodiesterase family member 2	ENPP2	350	E5RIA2_HUMAN;E7EUF1_HUMAN;ENPP2_HUMAN
177380000	181270000	152860000	182250000	209460000	288360000	283240000	260690000	221810000	222100000	187330000	210030000	258030000	225140000	295340000	312500000	219140000	229040000	245010000	90942000	196220000	213870000	143650000	143670000	112750000	230170000	0	130800000	0				Cytokine-cytokine receptor interaction;Endocytosis;Hematopoietic cell lineage;Osteoclast differentiation;Pathways in cancer	7	7	11	11	11	107.98	0	102.62	4902800000	128	P07333;E9PEK4;D6RGW1	P07333;E9PEK4	Macrophage colony-stimulating factor 1 receptor	CSF1R	358	CSF1R_HUMAN;E9PEK4_HUMAN
237680000	228570000	260290000	628099968	606019968	380700000	939590016	658040000	486110016	548590016	278980000	264050000	809600000	108130000	536369984	525880000	416080000	722969984	284889984	117020000	705529984	697939968	344980000	341110016	502510016	440600000	386729984	775089984	42910000				Axon guidance	16	16	28	28	28	109.86	0	323.31	19468000000	358	P54764;E9PG71;F5GZZ5;C9JEM6;H7C1N8;C9JIX8;C9JFX5	P54764;E9PG71	Ephrin type-A receptor 4;Receptor protein-tyrosine kinase	EPHA4	361	E9PG71_HUMAN;EPHA4_HUMAN
0	66539000	0	194820000	179330000	111540000	155620000	125140000	215450000	136670000	136900000	130280000	197950000	48281000	246420000	116490000	198540000	169490000	0	0	159540000	81480000	0	178610000	239800000	117570000	0	126130000	0				Leukocyte transendothelial migration	4	4	24.8	24.8	24.8	17.935	0	88.592	2747100000	82	P04216;E9PIM6;E9PNQ8;J3QRJ3	P04216;E9PIM6;E9PNQ8;J3QRJ3	Thy-1 membrane glycoprotein	THY1	365	E9PIM6_HUMAN;E9PNQ8_HUMAN;J3QRJ3_HUMAN;THY1_HUMAN
423900000	630280000	355820000	329249984	346160000	350830016	255930000	326100000	411720000	424480000	330640000	579640000	461350016	663080000	701040000	406289984	429070016	346720000	699950016	658339968	296080000	369200000	498040000	634440000	261770000	478710016	396100000	314380000	589049984				Complement and coagulation cascades;Neuroactive ligand-receptor interaction;Regulation of actin cytoskeleton	25	25	47.4	47.4	47.4	70.036	0	323.31	29119000000	627	P00734;E9PIT3;C9JV37;CON__P00735	P00734;E9PIT3	Prothrombin;Activation peptide fragment 1;Activation peptide fragment 2;Thrombin light chain;Thrombin heavy chain	F2	366	E9PIT3_HUMAN;THRB_HUMAN
662430016	277560000	576329984	1122899968	1152300032	884339968	1188999936	961489984	1089100032	1089500032	800920000	550940032	1084499968	363609984	930009984	994249984	1025400000	1219000064	592809984	227500000	1207500032	1021000000	720049984	543630016	1146899968	709939968	766240000	1114499968	147710000					15	15	52.3	52.3	52.3	38.39	0	323.31	49926000000	569	Q9UBP4;F6SYF8;E9PKW6;E9PHY3;E9PKK9	Q9UBP4;F6SYF8	Dickkopf-related protein 3	DKK3	394	DKK3_HUMAN;F6SYF8_HUMAN
42684000	0	42423000	125020000	88678000	68831000	107620000	71667000	54272000	57085000	64204000	51484000	86191000	0	82084000	74060000	48444000	85572000	0	0	112440000	69297000	52445000	61145000	96208000	88410000	68173000	101140000	0				Cell adhesion molecules (CAMs)	31	29	24.8	24.3	23.4	184.98	0	323.31	2721000000	255	Q9P2S2;G5E9G7;H7BZC7;H7C3J4;H7C3D6;H7C2R8;P58401	Q9P2S2;G5E9G7	Neurexin-2	NRXN2	423	G5E9G7_HUMAN;NRX2A_HUMAN
190740000	108930000	167170000	271160000	239020000	201710000	306449984	218370000	189280000	176740000	166530000	164180000	216200000	128110000	191440000	158430000	173280000	233700000	79587000	0	236120000	316660000	275360000	170420000	293889984	130780000	173690000	261660000	0					25	24	26.8	26.8	25.5	168.43	0	323.31	7576500000	349	G8JL96;Q13332;Q8NHS7;K7ERX4;K7ESP0	G8JL96;Q13332	Protein-tyrosine-phosphatase;Receptor-type tyrosine-protein phosphatase S	PTPRS	426	G8JL96_HUMAN;PTPRS_HUMAN
179230000	282160000	303889984	473240000	434729984	360500000	476249984	429550016	422060000	447840000	289280000	214570000	474200000	146300000	414820000	328660000	350600000	360590016	174990000	109140000	469510016	358390016	234260000	242290000	418620000	327310016	307700000	432630016	60717000					15	15	45	45	45	37.393	0	323.31	13580000000	224	Q13449;H3BLU2;F5H5G1;C9J5G3	Q13449;H3BLU2;F5H5G1;C9J5G3	Limbic system-associated membrane protein	LSAMP	445	C9J5G3_HUMAN;F5H5G1_HUMAN;H3BLU2_HUMAN;LSAMP_HUMAN
559760000	1075699968	2585499904	343260000	867790016	615820032	747340032	540910016	622120000	930870016	405889984	150550000	673470016	707030016	472609984	351780000	319800000	379480000	686880000	371560000	290849984	202400000	169080000	330809984	331920000	435830016	256870000	339920000	500369984				Adherens junction;Arrhythmogenic right ventricular cardiomyopathy (ARVC);Bacterial invasion of epithelial cells;Dilated cardiomyopathy;Focal adhesion;Hypertrophic cardiomyopathy (HCM);Leukocyte transendothelial migration;Pathogenic Escherichia coli infection;Phagosome;Phototransduction - fly;Regulation of actin cytoskeleton;Shigellosis;Tight junction;Vibrio cholerae infection;Viral myocarditis	18	1	68.5	68.5	4.5	41.792	0	323.31	23866000000	421	P63261;I3L4N8;A0A6Q8PFE4;I3L3I0;I3L1U9;J3KT65;K7EM38;I3L3R2;Q6S8J3;A0A2R8YEA7;A5A3E0;P0CG38;A0A2R8YFE2;Q9BYX7;P0CG39;A0A7P0TBL1;F8WCH0	P63261;I3L4N8;A0A6Q8PFE4;I3L3I0;I3L1U9	Actin, cytoplasmic 2;Actin, cytoplasmic 2, N-terminally processed	ACTG1	465	ACTG_HUMAN;I3L1U9_HUMAN;I3L3I0_HUMAN;I3L4N8_HUMAN
55520000	0	73129000	89472000	125190000	78206000	157290000	153780000	77398000	75166000	97014000	94879000	126060000	0	93392000	154460000	70124000	123350000	70732000	0	128870000	153680000	104600000	56096000	144720000	93908000	89241000	193500000	0					10	10	16.9	16.9	16.9	88.252	0	287.11	3496400000	202	P55286;J3QKW5;J3QLE6;J3KRI5;X6R3Y6;J3KTG8	P55286;J3QKW5;J3QLE6;J3KRI5;X6R3Y6;J3KTG8	Cadherin-8	CDH8	469	CADH8_HUMAN;J3KRI5_HUMAN;J3KTG8_HUMAN;J3QKW5_HUMAN;J3QLE6_HUMAN;X6R3Y6_HUMAN
330790016	301160000	0	162620000	218780000	134000000	215420000	0	120660000	232980000	0	279649984	265390000	325080000	344480000	321840000	135060000	173570000	444040000	290580000	208930000	223070000	115280000	891270016	179200000	341040000	214950000	230010000	941200000					5	5	52.5	52.5	52.5	11.284	0	177.32	6645900000	142	P02655;K7ER74;Q6P163;V9GYJ8	P02655;K7ER74;Q6P163;V9GYJ8	Apolipoprotein C-II;Proapolipoprotein C-II	APOC2;APOC4-APOC2	482	APOC2_HUMAN;K7ER74_HUMAN;Q6P163_HUMAN;V9GYJ8_HUMAN
77750000	0	81846000	113270000	80482000	78908000	79502000	64017000	93007000	0	73718000	68782000	79749000	0	58011000	74887000	64890000	71859000	0	0	86358000	69387000	45696000	0	74381000	66307000	67755000	97990000	0					12	12	23.8	23.8	23.8	82.577	0	120.38	1549000000	115	O00391;A8MXT8	O00391	Sulfhydryl oxidase 1	QSOX1	492	QSOX1_HUMAN
84714000	0	83908000	131870000	121860000	117170000	133130000	120350000	79194000	84493000	120860000	0	139660000	0	92456000	113090000	0	153100000	77717000	0	132690000	128650000	78185000	0	158820000	94962000	101800000	82481000	0					11	11	28.2	28.2	28.2	51.543	0	323.31	2648100000	102	O00451;E5RGR6;E5RJ44	O00451;E5RGR6	GDNF family receptor alpha-2	GFRA2	493	E5RGR6_HUMAN;GFRA2_HUMAN
722470016	360880000	768630016	1001100032	1207399936	789059968	1512199936	1058300032	863920000	858659968	664419968	652729984	1279800064	225130000	815649984	1113400064	823190016	1242700032	481100000	186300000	1125299968	1255200000	1067100032	404790016	1110800000	753020032	708070016	1037500032	197410000					41	41	43	43	43	135.07	0	323.31	122460000000	1262	O00533;A0A087X0M8;C9J905;H7C0J0;C9JH37;C9JW79;C9JEY3	O00533;A0A087X0M8	Neural cell adhesion molecule L1-like protein;Processed neural cell adhesion molecule L1-like protein	CHL1	494	A0A087X0M8_HUMAN;NCHL1_HUMAN
145600000	0	137710000	220830000	219890000	208460000	160630000	241980000	0	163790000	303620000	0	326409984	155150000	141970000	237680000	239920000	0	116480000	0	229270000	152710000	166490000	0	91443000	140060000	203690000	224940000	0					10	10	40	40	40	45.997	0	157.45	5140200000	162	O14498;H0YL90;H0YN67	O14498;H0YL90;H0YN67	Immunoglobulin superfamily containing leucine-rich repeat protein	ISLR	495	H0YL90_HUMAN;H0YN67_HUMAN;ISLR_HUMAN
253450000	117450000	120820000	456430016	318289984	293649984	511990016	285129984	346500000	324160000	208130000	220770000	409870016	37977000	286540000	312460000	374400000	271240000	156110000	53785000	370780000	298110016	302940000	138960000	398440000	261520000	264370000	389380000	47965000					30	29	30.6	30.6	30.1	143.09	0	323.31	20658000000	447	O14594;K7EKF8	O14594	Neurocan core protein	NCAN	496	NCAN_HUMAN
215450000	89513000	240210000	684750016	454670016	479980000	576350016	407470016	447760000	610380032	336030016	194700000	383540000	170470000	536510016	507489984	643390016	536700000	267970000	167270000	490230016	439780000	242670000	119830000	534120000	433600000	318560000	461849984	68196000					25	11	48.5	48.5	21	67.257	0	323.31	26350000000	549	O15240	O15240	Neurosecretory protein VGF;Neuroendocrine regulatory peptide-1;Neuroendocrine regulatory peptide-2;Antimicrobial peptide VGF[554-577]	VGF	505	VGF_HUMAN
480140000	198420000	525160000	971760000	945160000	849020032	1191600000	944630016	802550016	940179968	794569984	530790016	967449984	332310016	874750016	822369984	845200000	902140032	353089984	183000000	955630016	841369984	606200000	763440000	1335100032	797420032	697740032	1011400000	81394000				Glycosaminoglycan biosynthesis - keratan sulfate;Glycosphingolipid biosynthesis - lacto and neolacto series	14	14	53.3	53.3	53.3	47.119	0	323.31	34500000000	374	O43505	O43505	Beta-1,4-glucuronyltransferase 1	B4GAT1	510	B4GA1_HUMAN
1236600064	0	665390016	950849984	0	811830016	763369984	753809984	839929984	720960000	1594499968	432400000	824060032	430310016	1227800064	714529984	475060000	583110016	0	0	827219968	392390016	969040000	0	782060032	876380032	582320000	809670016	0				Axon guidance	13	13	33.5	33.5	33.5	74.823	0	169.87	10382000000	147	O75326;F5GYX3	O75326;F5GYX3	Semaphorin-7A	SEMA7A	520	F5GYX3_HUMAN;SEM7A_HUMAN
398849984	143560000	288009984	358470016	215930000	289830016	231800000	299590016	326030016	223100000	316620000	396230016	214830000	0	246030000	222180000	336860000	389830016	247170000	235620000	237490000	304060000	209520000	282780000	355969984	260510000	412409984	535030016	0					4	4	61.2	61.2	61.2	11.081	0	323.31	7870100000	185	O75711;D6RD99	O75711;D6RD99	Scrapie-responsive protein 1	SCRG1	523	D6RD99_HUMAN;SCRG1_HUMAN
444900000	0	0	1476999936	1432199936	1256099968	1889400064	1182899968	1120600064	1064200000	1366099968	1077200000	1156300032	0	1068700032	921180032	1282899968	1794899968	989249984	393260000	1034499968	1248700032	884840000	963020032	1404099968	850160000	891520000	1114300032	0					5	5	40	40	40	14.669	0	56.823	24284000000	126	O94772	O94772	Lymphocyte antigen 6H	LY6H	532	LY6H_HUMAN
671440000	264750000	464409984	598569984	795560000	676380032	863500032	594179968	779600000	625369984	490289984	422310016	563240000	253140000	658750016	588680000	619640000	776910016	238150000	190350000	771830016	684899968	564329984	450449984	726360000	523320000	575040000	621729984	110330000					36	18	39.6	39.6	20.3	109.79	0	323.31	45351000000	658	O94985;Q5SR54	O94985;Q5SR54	Calsyntenin-1;Soluble Alc-alpha;CTF1-alpha	CLSTN1	535	CSTN1_HUMAN;Q5SR54_HUMAN
530720000	1920000000	202730000	691459968	1069600000	618950016	755859968	956259968	747409984	558590016	457529984	523750016	917200000	450649984	970899968	835190016	769560000	894270016	452120000	177180000	1056899968	589160000	461350016	447680000	629320000	704609984	506100000	721329984	189770000				Amyotrophic lateral sclerosis (ALS);Huntington's disease;Peroxisome;Prion diseases	8	8	80.5	80.5	80.5	15.936	0	323.31	23439000000	187	P00441;H7BYH4	P00441;H7BYH4	Superoxide dismutase [Cu-Zn]	SOD1	543	H7BYH4_HUMAN;SODC_HUMAN
1810200064	1509200000	1348400000	1661900032	1298899968	2142899968	1067600000	921329984	2188499968	1189400064	2016600064	1976600064	1467900032	2675099904	2586500096	1350800000	1874700032	922969984	2639399936	2937499904	1105400064	873240000	2076899968	2201700096	1034200000	1290499968	1447200000	900070016	2568399872				Porphyrin and chlorophyll metabolism	57	57	65.4	65.4	65.4	122.2	0	323.31	218920000000	1837	P00450;E9PFZ2;H7C5R1;D6RE86;CON__ENSEMBL:ENSBTAP00000031900;H7C5N5	P00450;E9PFZ2;H7C5R1	Ceruloplasmin	CP	544	CERU_HUMAN;E9PFZ2_HUMAN;H7C5R1_HUMAN
0	543539968	0	2070000000	319120000	4489399808	19146000	0	3130899968	2060000000	1287100032	457230016	0	65530000	1820400000	0	3186299904	428060000	5684700160	18375000064	60050000	734240000	3093600000	172970000	11353000	955750016	778360000	0	197160000					32	16	66.5	66.5	44.6	45.205	0	323.31	169140000000	574	P00738;J3QR68;H0Y300;A0A0C4DGL8;J3QLC9;A0A087WU08;H3BS21;J3KRH2;J3KTC3;J3KSV1;J3QQI8;H3BMJ7	P00738;J3QR68;H0Y300;A0A0C4DGL8;J3QLC9;A0A087WU08	Haptoglobin;Haptoglobin alpha chain;Haptoglobin beta chain	HP	548	A0A087WU08_HUMAN;A0A0C4DGL8_HUMAN;H0Y300_HUMAN;HPT_HUMAN;J3QLC9_HUMAN;J3QR68_HUMAN
535070016	721729984	553070016	395590016	521440000	469470016	438160000	680110016	506929984	459520000	448780000	412270016	544390016	1153500032	718860032	433860000	606680000	505390016	936280000	716160000	382020000	521449984	575329984	967760000	421340000	764220032	455089984	405470016	743809984				Complement and coagulation cascades;Neuroactive ligand-receptor interaction;Staphylococcus aureus infection	47	47	71.9	71.9	71.9	90.568	0	323.31	50245000000	922	P00747;Q5TEH5;A6PVI2;CON__P06868;Q02325;Q15195;P08519	P00747	Plasminogen;Plasmin heavy chain A;Activation peptide;Angiostatin;Plasmin heavy chain A, short form;Plasmin light chain B	PLG	552	PLMN_HUMAN
696920000	1034300032	677369984	623129984	646249984	589640000	464849984	797150016	755680000	696070016	771649984	482600000	717630016	1463800064	1192499968	527889984	923390016	529320000	835249984	822790016	474230016	610089984	668060032	1127100032	509750016	1075000064	874550016	649289984	801880000				Complement and coagulation cascades	33	33	60.6	60.6	60.6	52.602	0	323.31	69508000000	962	P01008;CON__P41361	P01008	Antithrombin-III	SERPINC1	555	ANT3_HUMAN
54580998144	54344998912	45079998464	30413000704	32886999040	38712000512	25760999424	28863000576	38682001408	20785999872	32849000448	75216003072	25134000128	47222001664	44687998976	29076000768	30734999552	33444999168	55798001664	82166996992	28501999616	34768998400	71899996160	45937000448	25094000640	34043000832	34453000192	31850999808	56874000384				Complement and coagulation cascades	43	3	73.7	73.7	5.7	46.736	0	323.31	4121300000000	4114	P01009	P01009	Alpha-1-antitrypsin;Short peptide from AAT	SERPINA1	556	A1AT_HUMAN
4319600128	7287300096	3375399936	8387800064	7143799808	10060999680	4986999808	4102500096	19236999168	4068699904	9737900032	20316999680	5382099968	12296999936	12336000000	8447600128	8166600192	4850999808	19722999808	23992000512	4879399936	5943799808	3618400000	14035999744	5369500160	6665999872	14389999616	4781599744	8102900224					30	16	65	65	28.6	47.65	0	323.31	674240000000	1162	P01011;G3V595;A0A087WY93	P01011;G3V595	Alpha-1-antichymotrypsin;Alpha-1-antichymotrypsin His-Pro-less	SERPINA3	557	AACT_HUMAN;G3V595_HUMAN
3553299968	2714400000	2820199936	3158700032	3214400000	4280699904	3776600064	2808900096	2183200000	5492899840	3046899968	3902099968	3496600064	2738299904	2254200064	3841499904	2497900032	2670099968	3469400064	5570100224	2806899968	3000399872	3486500096	3952199936	2696199936	2547599872	2016600064	3025799936	10337000448				Complement and coagulation cascades	85	85	71.1	71.1	71.1	163.29	0	323.31	976070000000	3773	P01023;CON__ENSEMBL:ENSBTAP00000024146;P20742;H0YFH1;F8W7L3	P01023	Alpha-2-macroglobulin	A2M	558	A2MG_HUMAN
4443400192	3466500096	3721200128	3926200064	3448600064	5276400128	2570400000	3194599936	4363700224	3629700096	4176999936	5336399872	3685299968	6125400064	4060100096	3749600000	3866099968	3224999936	5566400000	5280300032	2821700096	3115500032	4188400128	4233499904	2955300096	3323099904	3220300032	2719899904	5336200192				Chagas disease (American trypanosomiasis);Complement and coagulation cascades;ko05152;Leishmaniasis;Phagosome;Staphylococcus aureus infection;Systemic lupus erythematosus	145	131	85.1	85.1	81.7	187.15	0	323.31	1417600000000	5679	P01024;M0QYC8;M0QXZ3;M0R0Q9;M0R1Q1;O95568	P01024	Complement C3;Complement C3 beta chain;C3-beta-c;Complement C3 alpha chain;C3a anaphylatoxin;Acylation stimulating protein;Complement C3b alpha chain;Complement C3c alpha chain fragment 1;Complement C3dg fragment;Complement C3g fragment;Complement C3d fragment;Complement C3f fragment;Complement C3c alpha chain fragment 2	C3	559	CO3_HUMAN
188240000	148730000	138870000	118400000	85693000	206970000	93825000	77253000	110960000	108140000	134650000	187750000	91536000	336860000	150460000	121420000	119310000	38709000	170360000	237070000	44296000	62936000	280100000	212270000	71836000	149910000	143900000	68230000	263880000				Complement and coagulation cascades;Prion diseases;Staphylococcus aureus infection;Systemic lupus erythematosus	44	44	34.4	34.4	34.4	188.3	0	323.31	11209000000	534	P01031;CON__Q1A7A4	P01031	Complement C5;Complement C5 beta chain;Complement C5 alpha chain;C5a anaphylatoxin;Complement C5 alpha chain	C5	560	CO5_HUMAN
141350000	445480000	131730000	301889984	367449984	234930000	405990016	239640000	217740000	0	388510016	262560000	548929984	344369984	195640000	242370000	202520000	284689984	244210000	0	350900000	245470000	146970000	336310016	377080000	277120000	150650000	240820000	100970000					8	8	57.5	57.5	57.5	23.171	0	321.15	8177100000	146	P01033;Q5H9A7;H0Y789;Q5H9B5;Q5H9B4	P01033;Q5H9A7;H0Y789	Metalloproteinase inhibitor 1	TIMP1	561	H0Y789_HUMAN;Q5H9A7_HUMAN;TIMP1_HUMAN
43929001984	13587000320	25614999552	52688998400	44642000896	41531998208	42161000448	43358998528	56025001984	42777001984	49643999232	46718001152	49570000896	19324999680	42962001920	52707999744	49236000768	50356998144	15882000384	20046000128	44480000000	38807998464	22321000448	30610999296	59506999296	35839000576	44769001472	36821000192	7327699968				Salivary secretion	12	12	63.7	63.7	63.7	15.799	0	323.31	1988400000000	2413	P01034	P01034	Cystatin-C	CST3	562	CYTC_HUMAN
2503699968	2009500032	2145799936	1887900032	996550016	1464400000	660670016	974809984	1198200064	1055600000	1277400064	2230200064	775689984	3180900096	1403900032	1320000000	1421500032	943609984	2050800000	2350200064	784369984	737100032	1341100032	1669500032	757489984	1213799936	983420032	949240000	2624499968				Complement and coagulation cascades	29	29	39.8	39.8	39.8	71.957	0	323.31	73386000000	596	P01042;CON__P01045-1;CON__Q2KJ62;CON__P01044-1	P01042	Kininogen-1;Kininogen-1 heavy chain;T-kinin;Bradykinin;Lysyl-bradykinin;Kininogen-1 light chain;Low molecular weight growth-promoting factor	KNG1	563	KNG1_HUMAN
202290000	0	243200000	403160000	436929984	444960000	441790016	416049984	402040000	498849984	311750016	283489984	394900000	119780000	276350016	374449984	351440000	293510016	169500000	103810000	452400000	440030016	179120000	245810000	424529984	369350016	269569984	433329984	89291000					9	9	30.7	30.7	30.7	30.787	0	323.31	7399800000	166	P01210;E5RFR1	P01210	Proenkephalin-A;Synenkephalin;Met-enkephalin;PENK(114-133);PENK(143-183);Met-enkephalin-Arg-Gly-Leu;Leu-enkephalin;PENK(237-258);Met-enkephalin-Arg-Phe	PENK	565	PENK_HUMAN
0	520310016	592230016	517049984	521089984	526620000	562929984	426990016	518769984	433380000	488160000	201340000	430270016	424320000	380910016	502680000	662560000	466849984	277710016	199700000	731470016	612430016	0	0	561880000	534609984	493180000	573020032	166780000					2	2	13.9	13.9	13.9	20.14	0	122.2	9545300000	66	P01344	P01344	Insulin-like growth factor II;Insulin-like growth factor II;Insulin-like growth factor II Ala-25 Del;Preptin	IGF2	568	IGF2_HUMAN
0	1468099968	3037799936	7815099904	4200999936	0	349809984	4566900224	0	2404300032	3395099904	0	2961600000	3263300096	0	2763000064	0	1673799936	2005900032	2629199872	1093400064	1355900032	1123000064	3059500032	3089999872	3711099904	1432300032	3063500032	6383200256					6	3	46.6	46.6	32.8	12.557	0	300.13	39354000000	105	P01619	P01619	Ig kappa chain V-III region B6		573	KV301_HUMAN
0	588049984	392889984	379000000	253480000	149280000	193140000	490500000	116210000	186690000	335880000	0	0	187950000	293040000	408040000	480200000	398820000	642819968	414000000	281320000	655110016	0	675270016	0	619590016	240340000	0	780790016					4	4	63.4	63.4	63.4	12.042	0	139.22	6342000000	92	P01714	P01714	Ig lambda chain V-III region SH		582	LV301_HUMAN
0	352729984	643600000	643720000	486430016	221650000	366990016	645699968	224940000	240470000	460129984	0	514590016	396809984	0	0	422390016	0	284360000	265630000	335289984	495200000	212980000	0	645859968	788560000	0	327200000	336620000					5	2	60.7	60.7	17.1	12.659	0	52.464	5919900000	67	P01742	P01742	Ig heavy chain V-I region EU		585	HV101_HUMAN
0	1291699968	1139100032	466480000	857990016	457249984	472420000	1314800000	623360000	765980032	697920000	691910016	656480000	808710016	652339968	961190016	1990800000	1060800000	1265900032	1562700032	1394899968	1381299968	298169984	2007500032	1667100032	1559900032	1455800064	1391100032	0					6	0	57.3	57.3	0	12.947	0	172.22	15826000000	131	P0DP03;P01768	P0DP03;P01768	Ig heavy chain V-III region CAM		590	HV307_HUMAN
441400000	791600000	1913400064	882800000	0	833590016	1646700032	1993600000	841110016	1636700032	1441400064	719929984	1982099968	1807100032	1057299968	2123399936	939409984	1612000000	1338599936	807030016	285830016	1745799936	512110016	2828600064	1748000000	1693200000	1178300032	1170300032	4298500096					6	3	43.6	37.6	18.8	12.943	0	91.322	32889000000	115	P01780	P01780	Ig heavy chain V-III region JON		591	HV319_HUMAN
7996299776	27444000768	26161000448	8753999872	22435999744	11166000128	20239998976	32675999744	12515999744	27328999424	17236000768	5497099776	31292999680	26795999232	15216000000	26843000832	9206599680	31394000896	12279000064	20231000064	33622999040	29739999232	9155999744	37304999936	26631999488	35686998016	19448000512	31936000000	55866998784					13	13	97.2	97.2	97.2	11.765	0	323.31	1289900000000	1120	P01834;A0A5H1ZRQ3	P01834;A0A5H1ZRQ3	Ig kappa chain C region	IGKC	595	IGKC_HUMAN
2987300096	3210200064	2917900032	3015600128	2761700096	2769600000	2980400128	2398000128	2001699968	2907300096	2701100032	2277600000	3184699904	2288600064	1691200000	2262700032	3656499968	3179200000	1145799936	784329984	3060999936	3805900032	2554299904	1748700032	2878400000	2322200064	2394700032	3782000128	1562899968				Amoebiasis;ECM-receptor interaction;Focal adhesion;Protein digestion and absorption	25	25	21.2	21.2	21.2	138.94	0	323.31	90182000000	670	P02452;I3L3H7;CON__Q862S4;P02458	P02452	Collagen alpha-1(I) chain	COL1A1	599	CO1A1_HUMAN
665400000	368489984	492380000	504580000	573990016	634689984	594120000	516980000	350849984	452480000	563009984	351849984	709260032	578809984	217490000	449540000	864110016	767870016	152130000	87489000	737710016	770929984	432870016	277630016	592120000	479910016	489340000	933020032	129020000				Amoebiasis;ECM-receptor interaction;Focal adhesion;Protein digestion and absorption	15	15	12.6	12.6	12.6	138.56	0	323.31	24756000000	402	P02461;CON__P04258	P02461	Collagen alpha-1(III) chain	COL3A1	600	CO3A1_HUMAN
24932999168	18837999616	25873000448	10762999808	11594999808	15598999552	11838999552	9697899520	14872999936	19508000768	10019000320	8342600192	11061999616	14823999488	17682999296	9589999616	12064000000	12211999744	18563999744	23604000768	6167699968	15009000448	16373000192	21019000832	10188000256	16650999808	15244000256	10021999616	27697000448				African trypanosomiasis;Fat digestion and absorption;PPAR signaling pathway;Vitamin digestion and absorption	38	38	77.5	77.5	77.5	30.777	0	323.31	1263600000000	1637	P02647;F8W696;CON__P15497	P02647;F8W696	Apolipoprotein A-I;Proapolipoprotein A-I;Truncated apolipoprotein A-I	APOA1	601	APOA1_HUMAN;F8W696_HUMAN
4686400000	6399799808	4221900032	9531199488	8410100224	10405000192	9736399872	8882799616	11559000064	7710900224	6341100032	6688099840	7257800192	4379500032	8752499712	7707500032	12627999744	9884099584	3955300096	3605400064	8044599808	7664699904	4035200000	4810999808	8451999744	6999000064	6935000064	7021799936	2249999872				Alzheimer's disease	34	34	81.1	81.1	81.1	36.154	0	323.31	674590000000	1254	P02649;H0Y7L5;E9PEV4;E7ERP7;CON__Q03247	P02649;H0Y7L5;E9PEV4;E7ERP7	Apolipoprotein E	APOE	602	APOE_HUMAN;E7ERP7_HUMAN;E9PEV4_HUMAN;H0Y7L5_HUMAN
6086199808	3713499904	5565499904	2500699904	2483399936	2743300096	2290800128	1996600064	3414700032	5816099840	2539099904	3269299968	2882599936	3743800064	2931000064	1834700032	3122599936	3042899968	2277299968	4196499968	1409900032	2149799936	4410200064	4392600064	2199699968	3244800000	2505900032	2689200128	6568099840				PPAR signaling pathway	10	10	72	72	72	11.175	0	323.31	184930000000	296	P02652;V9GYM3;V9GYG9;V9GYE3;V9GYC1;V9GYS1	P02652;V9GYM3;V9GYG9;V9GYE3;V9GYC1;V9GYS1	Apolipoprotein A-II;Proapolipoprotein A-II;Truncated apolipoprotein A-II	APOA2	603	APOA2_HUMAN;V9GYC1_HUMAN;V9GYE3_HUMAN;V9GYG9_HUMAN;V9GYM3_HUMAN;V9GYS1_HUMAN
822680000	352640000	1026899968	1150499968	376449984	1300700032	593550016	579539968	1086099968	2740900096	1267100032	1359699968	696060032	1554300032	843369984	909600000	952960000	547420032	1595299968	7102600192	501920000	556800000	930830016	1326599936	489769984	834209984	645409984	522670016	1752499968				Complement and coagulation cascades	48	48	63.2	63.2	63.2	94.972	0	323.31	122360000000	1247	P02671;A0A087WUA0;CON__P02672	P02671	Fibrinogen alpha chain;Fibrinopeptide A;Fibrinogen alpha chain	FGA	604	FIBA_HUMAN
903009984	131240000	826920000	1013100032	84155000	1128000000	420689984	451870016	538960000	3035000064	1194099968	612040000	421820000	1198200064	514550016	460249984	677369984	306820000	501000000	6381700096	197120000	284900000	554259968	904230016	162910000	706339968	413969984	321500000	982230016				Complement and coagulation cascades	42	42	77.2	77.2	77.2	55.928	0	323.31	96996000000	940	P02675;D6REL8;CON__P02676	P02675;D6REL8	Fibrinogen beta chain;Fibrinopeptide B;Fibrinogen beta chain	FGB	605	D6REL8_HUMAN;FIBB_HUMAN
1069600000	45948000	1109400064	1185400064	103070000	1435200000	423329984	541550016	592419968	3223899904	1281799936	796380032	369790016	1021800000	511240000	390180000	770440000	245570000	532409984	7471399936	196650000	331440000	817150016	1341600000	269100000	778400000	404360000	340680000	1049900032				Complement and coagulation cascades;Staphylococcus aureus infection	23	23	56.3	56.3	56.3	51.511	0	323.31	60197000000	489	P02679;C9JEU5;C9JC84;C9JPQ9;C9JU00	P02679;C9JEU5;C9JC84	Fibrinogen gamma chain	FGG	606	C9JC84_HUMAN;C9JEU5_HUMAN;FIBG_HUMAN
0	404209984	247840000	464400000	238800000	465480000	477900000	407820000	341820000	431020000	488310016	0	415670016	357769984	337609984	650590016	442009984	338040000	627699968	218910000	356489984	231370000	0	202540000	434230016	327820000	328270016	379889984	360950016				Chagas disease (American trypanosomiasis);Complement and coagulation cascades;Prion diseases;Staphylococcus aureus infection;Systemic lupus erythematosus	5	5	25.3	25.3	25.3	25.773	0	233.28	9888300000	116	P02747	P02747	Complement C1q subcomponent subunit C	C1QC	610	C1QC_HUMAN
278990016	0	146190000	220280000	70463000	673740032	0	25425000	1267900032	277960000	233570000	568129984	95422000	1029400000	814270016	185840000	1037100032	61394000	1022000000	1063299968	142100000	0	194610000	183030000	20646000	0	391489984	0	470840000				Amoebiasis;Complement and coagulation cascades;Prion diseases;Systemic lupus erythematosus	25	25	50.8	50.8	50.8	63.173	0	323.31	13966000000	298	P02748;CON__Q3MHN2;Q96BY6;REV__Q4AC99;A0A2R8YD85	P02748	Complement component C9;Complement component C9a;Complement component C9b	C9	611	CO9_HUMAN
1296000000	1468999936	1383600000	994019968	962320000	880190016	630200000	719889984	1160600064	744529984	921769984	1290700032	721070016	1851900032	1312300032	656489984	1069699968	940929984	1240700032	1698800000	780819968	1024099968	1324899968	2107800064	764510016	1272999936	989340032	702910016	1636499968					21	21	68.7	68.7	68.7	38.298	0	323.31	76180000000	790	P02749;J3QRN2;J3QLI0;J3KS17;CON__P17690	P02749	Beta-2-glycoprotein 1	APOH	612	APOH_HUMAN
316489984	71845000	251020000	461390016	159190000	470849984	147580000	140600000	793950016	169800000	295550016	1153799936	104030000	565800000	1010000000	272430016	530020000	236360000	932160000	1699699968	318590016	178300000	377150016	535550016	216990000	199500000	727350016	225690000	492009984					13	13	48.1	48.1	48.1	38.177	0	323.31	28509000000	395	P02750	P02750	Leucine-rich alpha-2-glycoprotein	LRG1	613	A2GL_HUMAN
992780032	970750016	1026800000	1580300032	1265200000	1386899968	1791000064	1605600000	814369984	1659800064	1187900032	657129984	1744400000	654990016	906569984	1356400000	1452400000	1528700032	532590016	407060000	1408800000	1466800000	937169984	724520000	1118200064	1324800000	955000000	1529299968	337580000				Amoebiasis;Bacterial invasion of epithelial cells;ECM-receptor interaction;Focal adhesion;Pathways in cancer;Regulation of actin cytoskeleton;Small cell lung cancer	96	96	52.8	52.8	52.8	272.32	0	323.31	253850000000	2748	P02751;H0Y7Z1;H0Y4K8	P02751	Fibronectin;Anastellin;Ugl-Y1;Ugl-Y2;Ugl-Y3	FN1	614	FINC_HUMAN
562449984	684430016	569699968	383040000	548540032	390729984	409670016	362590016	484460000	392870016	331060000	638230016	354560000	537609984	687070016	374420000	552000000	427320000	377990016	305820000	484860000	457900000	397030016	859059968	622259968	453520000	452480000	641990016	289049984					13	13	77.1	77.1	77.1	23.01	0	323.31	32663000000	521	P02753;Q5VY30	P02753;Q5VY30	Retinol-binding protein 4;Plasma retinol-binding protein(1-182);Plasma retinol-binding protein(1-181);Plasma retinol-binding protein(1-179);Plasma retinol-binding protein(1-176)	RBP4	615	Q5VY30_HUMAN;RET4_HUMAN
611800000	835750016	818860032	363220000	541609984	511660000	389660000	436060000	360560000	503340000	540240000	1016899968	378700000	934390016	726680000	388140000	358000000	444460000	421470016	423020000	351350016	627769984	579950016	791139968	346889984	595849984	404470016	498609984	1102300032					17	17	53.1	53.1	53.1	38.999	0	323.31	27617000000	462	P02760;S4R471;S4R3Y4;CON__P00978	P02760	Protein AMBP;Alpha-1-microglobulin;Inter-alpha-trypsin inhibitor light chain;Trypstatin	AMBP	616	AMBP_HUMAN
8589100032	6609299968	4878400000	5449500160	6665299968	12288000000	3969999872	3838200064	16366999552	4281999872	8084899840	24394999808	4470099968	18537000960	19655000064	9577799680	9402999808	4683100160	22940999680	26976000000	4962999808	4997300224	7803599872	12337999872	4372299776	5006900224	15029000192	3850599936	11598000128					15	9	57.7	57.7	40.3	23.511	0	323.31	427560000000	688	P02763	P02763	Alpha-1-acid glycoprotein 1	ORM1	617	A1AG1_HUMAN
6410299904	5612800000	8625200128	2717199872	3272800000	2502899968	2717900032	4257799936	2058200064	3127899904	3832199936	7633800192	2932699904	3978899968	3077499904	2424699904	2449100032	4001200128	2555699968	3203000064	3360100096	4342400000	11854000128	3844300032	3136000000	4662799872	2569799936	4187099904	5506800128					15	15	51	51	51	39.34	0	323.31	347210000000	927	P02765;C9JV77;CON__P12763	P02765;C9JV77	Alpha-2-HS-glycoprotein;Alpha-2-HS-glycoprotein chain A;Alpha-2-HS-glycoprotein chain B	AHSG	618	C9JV77_HUMAN;FETUA_HUMAN
2002300032	2157499904	3577299968	120210000	401160000	23008000	700430016	663480000	15202000	90415000	324520000	1387600000	299190016	303080000	0	398280000	7259200	1065900032	0	3328000	1693299968	1734700032	6035200000	448180000	627820032	303100000	215270000	1765500032	3376800000					41	41	78	78	78	68.677	0	323.31	152630000000	1002	P02771;J3KMX3;CON__Q3SZ57	P02771;J3KMX3	Alpha-fetoprotein	AFP	619	FETA_HUMAN;J3KMX3_HUMAN
28266999808	27420000256	30809999360	30770999296	30592999424	20078000128	25397999616	29639999488	32686000128	24679999488	20073000960	27281000448	31644000256	22535000064	28938999808	22993999872	28034000896	36848001024	32334000128	22595000320	27090999296	26126999552	35046998016	24098000896	24941000704	28361000960	26506000384	27113000960	26254000128				Mineral absorption	86	75	81.4	81.4	71.8	77.063	0	323.31	4584700000000	4486	P02787;H7C5E8;F8WCI6;C9JB55;F8WEK9;CON__Q29443;CON__Q0IIK2;CON__Q2HJF0;F8WC57	P02787	Serotransferrin	TF	622	TRFE_HUMAN
3949199872	482480000	1824499968	4411500032	4155300096	6729299968	2131800064	2939300096	9646600192	4052900096	4414199808	2635599872	2647899904	3317900032	7613899776	2753900032	7401800192	1205699968	10426999808	14339999744	2133100032	2660600064	4918000128	7508100096	3082400000	4672099840	6041699840	2146800000	4003099904					34	34	72.9	72.9	72.9	51.676	0	323.31	300720000000	887	P02790;Q9BS19	P02790;Q9BS19	Hemopexin	HPX	623	HEMO_HUMAN;Q9BS19_HUMAN
1582300032	773670016	1172800000	920640000	660579968	1190599936	496100000	596390016	1124899968	821299968	988750016	1669600000	540350016	1472700032	837059968	727500032	1269500032	790809984	763470016	2621400064	489310016	741230016	1269200000	1219600000	403310016	1008200000	1021400000	462920000	1798700032				ECM-receptor interaction;Focal adhesion	15	13	40	40	36.2	54.305	0	323.31	62571000000	555	P04004;H0YJW9;F5GX75	P04004	Vitronectin;Vitronectin V65 subunit;Vitronectin V10 subunit;Somatomedin-B	VTN	625	VTNC_HUMAN
93842000	107340000	197720000	164570000	97514000	190130000	54672000	126610000	82137000	112060000	120390000	133360000	141790000	327660000	282660000	569280000	160150000	144470000	245040000	121620000	84914000	195450000	48297000	366120000	198430000	261620000	138370000	124630000	137290000					12	12	25	25	25	59.578	0	237.53	6631200000	161	P04196	P04196	Histidine-rich glycoprotein	HRG	632	HRG_HUMAN
1468600064	1522499968	1293900032	1767699968	929459968	1449299968	659129984	645299968	1321500032	923440000	1286400000	1704000000	973740032	2504399872	1734400000	965129984	1865799936	884979968	2110400000	2169799936	812230016	1236000000	2270299904	1744899968	718780032	1352499968	1300000000	805390016	1714899968					17	17	58.6	58.6	58.6	54.253	0	323.31	89953000000	619	P04217;M0R009;CON__Q2KJF1	P04217;M0R009	Alpha-1B-glycoprotein	A1BG	634	A1BG_HUMAN;M0R009_HUMAN
333689984	134950000	534470016	2068899968	1810899968	1336999936	1999800064	1323699968	1636400000	1436600064	1058300032	462280000	1639100032	561870016	1943100032	1680999936	1992899968	1684400000	932710016	522529984	2015100032	1475100032	526080000	483689984	1557200000	1275000064	1237600000	1349100032	82219000					39	39	52.3	52.3	52.3	78.275	0	323.31	86337000000	850	P05060;A0A0A0MT66	P05060;A0A0A0MT66	Secretogranin-1;PE-11;GAWK peptide;CCB peptide	CHGB	638	A0A0A0MT66_HUMAN;SCG1_HUMAN
430150016	45062000	468000000	669649984	478470016	551929984	884889984	406440000	607310016	596510016	373849984	256180000	628630016	0	662000000	419329984	505929984	599889984	129760000	31837000	635390016	399020000	659329984	322889984	578360000	658019968	526510016	716390016	49441000				Alzheimer's disease	27	25	43.5	43.5	42.3	86.942	0	323.31	36135000000	629	P05067;A0A0A0MRG2;E9PG40;H7C0V9;H7C2L2	P05067;A0A0A0MRG2;E9PG40;H7C0V9	Amyloid beta A4 protein;N-APP;Soluble APP-alpha;Soluble APP-beta;C99;Beta-amyloid protein 42;Beta-amyloid protein 40;C83;P3(42);P3(40);C80;Gamma-secretase C-terminal fragment 59;Gamma-secretase C-terminal fragment 57;Gamma-secretase C-terminal fragment 50;C31	APP	639	A0A0A0MRG2_HUMAN;A4_HUMAN;E9PG40_HUMAN;H7C0V9_HUMAN
434880000	168810000	640729984	880659968	677299968	698320000	579740032	587550016	789790016	699960000	691689984	403520000	543880000	339540000	539910016	986540032	680720000	889289984	491190016	213090000	791849984	683289984	579820032	240260000	798380032	526929984	547009984	685990016	0					8	2	45.3	45.3	13.2	23.729	0	323.31	14582000000	201	P05408;C9JNY7;H7C4X7	P05408;C9JNY7;H7C4X7	Neuroendocrine protein 7B2;N-terminal peptide;C-terminal peptide	SCG5	643	7B2_HUMAN;C9JNY7_HUMAN;H7C4X7_HUMAN
1067200000	1134899968	1104499968	1529900032	1544899968	1386499968	1661100032	1577600000	1254499968	1303600000	1294800000	1003500032	1458800000	617219968	1135100032	1208899968	1583399936	2609299968	883990016	824460032	1923200000	2187500032	915420032	1136700032	1798400000	1601400064	1345500032	1710000000	570140032					15	11	69.3	69.3	53	22.537	0	323.31	54988000000	382	P05452;E9PHK0	P05452;E9PHK0	Tetranectin	CLEC3B	646	E9PHK0_HUMAN;TETN_HUMAN
394230016	247620000	301680000	278369984	304140000	344689984	361190016	311020000	364080000	344169984	367369984	565049984	350480000	509400000	425790016	178980000	399760000	252960000	340969984	313000000	194540000	332560000	352940000	387950016	259870000	478080000	401169984	614979968	0					13	13	41.4	41.4	41.4	46.324	0	323.31	18817000000	381	P05543;CON__Q9TT36	P05543	Thyroxine-binding globulin	SERPINA7	647	THBG_HUMAN
289000000	331289984	452350016	408689984	327900000	438529984	290030016	542049984	349460000	379750016	429409984	224310000	472240000	435169984	413560000	369560000	391160000	498030016	178900000	144900000	407760000	369820000	450940000	233250000	262900000	390870016	409950016	493720000	234820000				Complement and coagulation cascades	18	18	42.7	42.7	42.7	57.07	0	323.31	21337000000	387	P05546;CON__ENSEMBL:ENSBTAP00000018574	P05546	Heparin cofactor 2	SERPIND1	648	HEP2_HUMAN
172130000	0	217550000	0	345670016	221160000	214320000	370020000	160810000	227820000	0	0	337700000	0	306980000	191110000	373080000	262300000	202880000	194200000	366430016	369000000	0	725489984	358860000	333289984	241950000	302809984	711600000					4	4	29.8	29.8	29.8	13.38	0	217.17	6072100000	99	P06312	P06312	Ig kappa chain V-IV region	IGKV4-1	652	KV401_HUMAN
692790016	1303600000	841990016	1635800064	1522599936	1144000000	1366700032	1356499968	1808199936	1277699968	1314300032	751990016	1717100032	928940032	1713200000	1159699968	1422700032	1846400000	709280000	654360000	1010899968	1364999936	608190016	1227600000	1449900032	1580499968	1273400064	1492800000	783420032				Fc gamma R-mediated phagocytosis;Regulation of actin cytoskeleton	45	15	67.5	67.5	30.4	85.696	0	323.31	139230000000	1232	P06396;A0A0A0MS51;A0A0A0MT01;A0A0U1RQL8;Q5T0H8	P06396;A0A0A0MS51;A0A0A0MT01	Gelsolin	GSN	654	A0A0A0MS51_HUMAN;A0A0A0MT01_HUMAN;GELS_HUMAN
1306200064	561740032	873920000	2230299904	1034400000	2120600064	652840000	619929984	1314400000	2640399872	611219968	1647399936	307680000	1092000000	1713500032	689590016	1696600064	1375600000	1548400000	4272199936	661489984	843750016	488409984	1511100032	1697699968	702569984	921660032	605129984	2897700096					39	37	77	77	74	45.371	0	323.31	139330000000	880	P06727	P06727	Apolipoprotein A-IV	APOA4	656	APOA4_HUMAN
518929984	614680000	402030016	552300032	871440000	418480000	636179968	623129984	740000000	483169984	344300000	406960000	673779968	510489984	664819968	693830016	827340032	625190016	341630016	311240000	614440000	874360000	357420000	662140032	558499968	367049984	236990000	643000000	0					5	5	55.8	55.8	55.8	17.644	0	323.31	17743000000	240	P07998;G3V357	P07998;G3V357	Ribonuclease pancreatic	RNASE1	671	G3V357_HUMAN;RNAS1_HUMAN
642950016	508910016	476390016	239540000	255790000	320529984	165370000	280920000	276480000	224980000	336060000	1077100032	283969984	523580000	495900000	224030000	162190000	286980000	422420000	516729984	177570000	271360000	919529984	366580000	207280000	269470016	198570000	215610000	566969984					11	11	41.5	41.5	41.5	45.14	0	323.31	15965000000	254	P08185;G3V350;G3V4V7	P08185	Corticosteroid-binding globulin	SERPINA6	672	CBG_HUMAN
341350016	259250000	200510000	405470016	373260000	384369984	364480000	358569984	365150016	395380000	337900000	327289984	386400000	287040000	348160000	315040000	335030016	396910016	197070000	45635000	387060000	338870016	330980000	224970000	409960000	427910016	355080000	436160000	0				Bladder cancer;GnRH signaling pathway;Leukocyte transendothelial migration;Pathways in cancer	27	27	57.3	57.3	57.3	73.881	0	323.31	16914000000	415	P08253;H3BR66;H3BV48;H3BS34;P09237	P08253	72 kDa type IV collagenase;PEX	MMP2	674	MMP2_HUMAN
113400000	231300000	227170000	139640000	97987000	134900000	108390000	111430000	186040000	132460000	123050000	155550000	0	0	380169984	120340000	55997000	0	0	84162000	239220000	126450000	103650000	119190000	148270000	109170000	199250000	91270000	0					7	7	39.6	39.6	39.6	25.851	0	254.31	3520600000	137	P08294;M0R1V4	P08294	Extracellular superoxide dismutase [Cu-Zn]	SOD3	675	SODE_HUMAN
325660000	1398499968	220560000	791000000	461420000	499870016	681089984	453510016	415820000	413680000	788649984	351350016	1065400000	892000000	400150016	802630016	371900000	579830016	1520999936	327630016	657969984	358990016	245900000	269369984	518200000	503740000	445409984	549080000	207990000				Amoebiasis;Hematopoietic cell lineage;ko05152;MAPK signaling pathway;Pathogenic Escherichia coli infection;Phagosome;Regulation of actin cytoskeleton;Toll-like receptor signaling pathway	15	15	59.5	59.5	59.5	40.076	0	323.31	26926000000	374	P08571;D6RFL4;E7EVL5	P08571;D6RFL4	Monocyte differentiation antigen CD14;Monocyte differentiation antigen CD14, urinary form;Monocyte differentiation antigen CD14, membrane-bound form	CD14	677	CD14_HUMAN;D6RFL4_HUMAN
841230016	794649984	1090800000	963680000	812339968	662670016	911889984	929630016	1000499968	1004499968	847390016	996430016	952190016	1170200064	857500032	898280000	1282599936	898659968	1003200000	766080000	960809984	960830016	1183200000	988280000	849529984	895310016	799049984	851000000	1523800064				Complement and coagulation cascades;Staphylococcus aureus infection	69	61	65.2	65.2	58.2	139.09	0	323.31	163030000000	1805	P08603;A0A0D9SG88;Q5TFM2;Q02985;A0A087WYK9;Q6NSD3;A0A3B3IS28	P08603	Complement factor H	CFH	679	CFAH_HUMAN
767660032	845129984	714409984	493320000	503180000	686339968	413169984	547329984	829080000	552089984	563420032	815400000	481500000	1084600064	833729984	600489984	675009984	584529984	927689984	1026600000	404220000	666800000	543150016	763849984	522710016	669710016	733710016	534920000	621689984				Complement and coagulation cascades	25	25	56.4	56.4	56.4	54.565	0	323.31	37433000000	540	P08697;A0A0G2JPA8;C9JMH6;A0A0J9YY65;C9JPV4;A0A0J9YWQ3;CON__P28800	P08697;A0A0G2JPA8;C9JMH6	Alpha-2-antiplasmin	SERPINF2	681	A2AP_HUMAN;C9JMH6_HUMAN
210190000	108280000	111550000	435960000	251910000	455089984	302060000	252810000	404110016	372320000	319969984	328689984	236560000	258230000	409460000	217080000	361080000	272729984	76529000	107130000	262300000	231790000	106410000	336340000	295880000	266050000	320700000	277870016	40553000					12	12	48.5	48.5	48.5	34.632	0	223.46	13989000000	304	P09486;F5GY03;E5RK62;F5H4E2	P09486;F5GY03	SPARC	SPARC	685	F5GY03_HUMAN;SPRC_HUMAN
262090000	529580000	349969984	800870016	749660032	547100032	736110016	519689984	568550016	667260032	570609984	386120000	578220032	433409984	492920000	764880000	655409984	371209984	508300000	397800000	699689984	542449984	377020000	527620000	571480000	534529984	691849984	703809984	385740000				Complement and coagulation cascades;Staphylococcus aureus infection;Systemic lupus erythematosus	26	25	51.2	51.2	50	76.684	0	323.31	30742000000	653	P09871;F8WCZ6;A0A087X232;H0Y5D1;F5H7T4;B5MCV4	P09871;F8WCZ6;A0A087X232	Complement C1s subcomponent;Complement C1s subcomponent heavy chain;Complement C1s subcomponent light chain	C1S	688	A0A087X232_HUMAN;C1S_HUMAN;F8WCZ6_HUMAN
1114899968	1203000064	424609984	1659800064	848830016	1500400000	809590016	1413200000	791009984	914200000	1597600000	1209900032	1141400064	1275200000	778240000	1014300032	1447500032	624630016	1709500032	1063800000	1530200064	1177100032	725449984	774849984	980840000	752040000	1215699968	1248800000	957560000				Complement and coagulation cascades;Staphylococcus aureus infection;Systemic lupus erythematosus	101	1	63.5	4.4	0.7	192.78	0	129.43	29384000000	139	P0C0L4	P0C0L4	Complement C4-A;Complement C4 beta chain;Complement C4-A alpha chain;C4a anaphylatoxin;C4b-A;C4d-A;Complement C4 gamma chain	C4A	691	CO4A_HUMAN
2108300032	2412999936	917859968	2361700096	1595500032	2912100096	1689699968	2519099904	1420999936	2842500096	3205299968	1496000000	1636300032	2156000000	1568499968	2323800064	2199099904	963649984	2987899904	1772300032	3218500096	1943800064	981809984	1330499968	1637600000	1230099968	2228300032	1711800064	2007299968				Complement and coagulation cascades;Staphylococcus aureus infection;Systemic lupus erythematosus	102	1	63.8	63.8	1	192.75	0	323.31	588900000000	3459	P0C0L5;F5GXS0;A0A3B3ISA6	P0C0L5;F5GXS0;A0A3B3ISA6	Complement C4-B;Complement C4 beta chain;Complement C4-B alpha chain;C4a anaphylatoxin;C4b-B;C4d-B;Complement C4 gamma chain	C4B	692	CO4B_HUMAN;F5GXS0_HUMAN
0	0	0	1487299968	711289984	378200000	276280000	0	1058000000	174310000	773150016	391630016	156400000	0	760409984	556780032	344800000	270929984	180880000	22649999360	0	238440000	0	2270200064	1484899968	355950016	2323699968	810700032	477649984					12	6	70.5	70.5	46.7	13.532	0	323.31	34833000000	143	P0DJI8;E9PQD6	P0DJI8;E9PQD6	Serum amyloid A-1 protein;Amyloid protein A;Serum amyloid protein A(2-104);Serum amyloid protein A(3-104);Serum amyloid protein A(2-103);Serum amyloid protein A(2-102);Serum amyloid protein A(4-101);Serum amyloid A protein	SAA1	693	E9PQD6_HUMAN;SAA1_HUMAN
6698200064	18474999808	27264999424	9008199680	17935998976	10661000192	20138000384	25240999936	9670599680	18891999232	18670999552	4615600128	27721000960	20917000192	13157000192	19445999616	14629000192	24288000000	11178000384	17571000320	18993999872	35742998528	6863000064	30958999552	20441999360	28199999488	13699999744	23512000512	46065000448					10	4	93.4	93.4	57.5	11.293	0	323.31	719930000000	568	P0DOY2;P0DOY3;P0CF74	P0DOY2;P0DOY3			695
4018700032	19754000384	1952899968	3032399872	2484199936	2091600000	3201999872	2163800064	1587800064	1543100032	3991899904	5258399744	2851000064	4794999808	1401799936	1773400064	1367900032	2665999872	7244400128	849110016	1687800064	1517299968	1505900032	1184700032	2276600064	1603100032	1627200000	2321999872	1819900032				ECM-receptor interaction;Focal adhesion;Toll-like receptor signaling pathway	13	13	49.4	49.4	49.4	35.422	0	323.31	108840000000	485	P10451;D6R9C5;CON__P31096	P10451	Osteopontin	SPP1	701	OSTP_HUMAN
0	35049000	0	61848000	54479000	69605000	78354000	63671000	42677000	48461000	47016000	47608000	65849000	0	0	49710000	47013000	75615000	0	0	66496000	59907000	109790000	0	57999000	51606000	41014000	61018000	0				Adherens junction;Cell adhesion molecules (CAMs);Insulin signaling pathway	20	7	17	17	7.1	212.88	0	236.51	1416100000	155	P10586;H0Y6Z7;A2A437	P10586;H0Y6Z7	Receptor-type tyrosine-protein phosphatase F	PTPRF	702	H0Y6Z7_HUMAN;PTPRF_HUMAN
465270016	923980032	603809984	1142200064	1096700032	646440000	1104400000	1112700032	865580032	695750016	783270016	696160000	1434400000	894280000	764360000	1129200000	821120000	840329984	2207500032	872419968	1328999936	691009984	711590016	935689984	1053900032	1107200000	948899968	1086800000	903080000				Complement and coagulation cascades;Prion diseases;Systemic lupus erythematosus	42	41	65.2	65.2	64.4	93.517	0	323.31	78608000000	1047	P10643;CON__Q29RQ1	P10643	Complement component C7	C7	704	CO7_HUMAN
440520000	144130000	645409984	1381299968	1496999936	1156199936	1646000000	1410400000	1071900032	1130000000	983630016	540089984	1353799936	403680000	1178499968	1435699968	1136000000	1379800064	789649984	375540000	1323299968	1380199936	522220000	555889984	1226000000	951280000	877880000	1391399936	138800000					23	23	68.3	68.3	68.3	50.688	0	323.31	86851000000	731	P10645;G5E968	P10645;G5E968	Chromogranin-A;Vasostatin-1;Vasostatin-2;EA-92;ES-43;Pancreastatin;SS-18;WA-8;WE-14;LF-19;Catestatin;AL-11;GV-19;GR-44;ER-37;GE-25;Serpinin-RRG;Serpinin;p-Glu serpinin precursor	CHGA	705	CMGA_HUMAN;G5E968_HUMAN
8568900096	8392500224	9603500032	13134000128	6446600192	10561000448	9041300480	9096200192	8435400192	10824999936	12540000256	7217500160	14323000320	9762199552	11788000256	11363999744	15525999616	9481799680	8715799552	5482500096	12032000000	10442000384	6081399808	6366000128	10496000000	9202700288	9257199616	10350999552	4838700032					25	25	48.3	48.3	48.3	52.494	0	323.31	713370000000	1122	P10909;H0YLK8;H0YC35;E7ERK6;E7ETB4;E5RJZ5;E5RGB0;E5RH61;H0YAS8;E5RG36	P10909;H0YLK8;H0YC35;E7ERK6	Clusterin;Clusterin beta chain;Clusterin alpha chain;Clusterin	CLU	707	CLUS_HUMAN;E7ERK6_HUMAN;H0YC35_HUMAN;H0YLK8_HUMAN
157910000	55979000	166510000	400340000	375830016	228090000	488449984	312630016	382580000	373950016	253800000	165030000	326009984	34955000	332080000	419670016	394449984	490440000	213220000	73987000	512320000	320320000	131440000	96319000	499380000	294160000	231780000	340320000	34498000					24	24	55.8	55.8	55.8	70.94	0	323.31	15471000000	373	P13521;C9JQI2;C9JDT0	P13521	Secretogranin-2;Secretoneurin;Manserin	SCG2	717	SCG2_HUMAN
71550000	0	81479000	166100000	113690000	117770000	106420000	54987000	58175000	101680000	93289000	113370000	92305000	0	64931000	103430000	72878000	68707000	106210000	0	118230000	89699000	108070000	49421000	103150000	76198000	126680000	73010000	0				Cell adhesion molecules (CAMs)	16	16	6.1	6.1	6.1	372.82	0	186.99	3012200000	169	P13611;E9PF17;D6RGZ6;Q86W61	P13611;E9PF17;D6RGZ6;Q86W61	Versican core protein	VCAN	718	CSPG2_HUMAN;D6RGZ6_HUMAN;E9PF17_HUMAN;Q86W61_HUMAN
58235000	57182000	0	30724000	0	87405000	41483000	33691000	145050000	30619000	68740000	62515000	0	145270000	119390000	42986000	80394000	40993000	248610000	361390016	23797000	92959000	99327000	287740000	87209000	104290000	100550000	31913000	71566000				Complement and coagulation cascades;Prion diseases;Systemic lupus erythematosus	29	29	37	37	37	104.79	0	323.31	3344600000	212	P13671;C9JC72	P13671	Complement component C6	C6	719	CO6_HUMAN
155910000	127620000	132540000	216960000	148110000	187180000	172480000	180240000	218800000	202480000	260090000	221260000	149150000	34323000	225980000	140260000	199990000	182970000	63232000	84497000	184210000	158030000	162220000	187700000	188490000	159750000	206740000	188350000	62357000					41	40	43.8	43.8	43.8	136.38	0	323.31	15632000000	594	P14543	P14543	Nidogen-1	NID1	724	NID1_HUMAN
92571000	277310016	75579000	136880000	232890000	134280000	263380000	163120000	88827000	136810000	102970000	66540000	211390000	0	145710000	125440000	86883000	216150000	0	0	161020000	186790000	174700000	0	124660000	120280000	91693000	260760000	0				Carbon fixation in photosynthetic organisms;Glycolysis / Gluconeogenesis;Purine metabolism;Pyruvate metabolism;Type II diabetes mellitus	20	0	49.7	49.7	0	57.936	0	323.31	5596200000	193	P14618;B4DNK4	P14618;B4DNK4	Pyruvate kinase PKM;Pyruvate kinase	PKM	726	B4DNK4_HUMAN;KPYM_HUMAN
142730000	0	114750000	211080000	190160000	223060000	178650000	167930000	211060000	167600000	215150000	168030000	213220000	0	179450000	171780000	135190000	225010000	65947000	48123000	177230000	114550000	152890000	128900000	205710000	194890000	219970000	207710000	0					11	11	55.5	55.5	55.5	24.399	0	194.61	4278800000	183	P16035;B4DFW2;K7EIX4;K7EL90	P16035;B4DFW2	Metalloproteinase inhibitor 2	TIMP2	736	B4DFW2_HUMAN;TIMP2_HUMAN
91667000	3332199936	58607000	95512000	251400000	131840000	235650000	137520000	111780000	115180000	84317000	147640000	220210000	112350000	140170000	117600000	97493000	184620000	81897000	0	188830000	149040000	88106000	61185000	153350000	109170000	72807000	139650000	0					16	16	72.7	72.7	72.7	24.802	0	323.31	8585500000	163	P17677	P17677	Neuromodulin	GAP43	743	NEUM_HUMAN
428600000	311969984	289649984	765510016	633849984	520020000	778819968	717609984	501390016	423920000	801400000	464910016	519380000	0	641030016	743120000	596060032	941129984	350740000	351660000	567200000	476510016	245770000	448420000	972019968	409150016	446249984	758620032	0				Lysosome	9	9	63.2	63.2	63.2	20.838	0	307.4	17075000000	209	P17900;H0YBY3;E5RJD0	P17900	Ganglioside GM2 activator;Ganglioside GM2 activator isoform short	GM2A	744	SAP3_HUMAN
524670016	430889984	589299968	881550016	645550016	786249984	559089984	535500000	654520000	590940032	746449984	482089984	502089984	0	568480000	722499968	644899968	778870016	316769984	230860000	475870016	671320000	450880000	436070016	556019968	589129984	551280000	652750016	225150000					15	15	65.2	65.2	65.2	34.814	0	323.31	23421000000	310	P18065;C9JMY1;C9JW52;H7C1H0	P18065;C9JMY1	Insulin-like growth factor-binding protein 2	IGFBP2	745	C9JMY1_HUMAN;IBP2_HUMAN
67648000	0	0	104830000	0	67761000	48323000	34854000	224190000	47862000	99631000	251780000	48562000	59738000	104100000	77427000	94619000	0	84685000	394180000	0	0	41649000	72554000	75883000	60036000	140930000	48793000	108550000				ko05152;Toll-like receptor signaling pathway	10	10	26.8	26.8	26.8	53.383	0	224.96	3235500000	132	P18428	P18428	Lipopolysaccharide-binding protein	LBP	746	LBP_HUMAN
126120000	0	78636000	179470000	169330000	154300000	215230000	143870000	128990000	162740000	141260000	100180000	152830000	0	144090000	143830000	161940000	194680000	0	0	190130000	227470000	55640000	70266000	195100000	194660000	98169000	163650000	0					21	9	32.7	32.7	12.1	108.33	0	204.12	3769600000	190	P19021;H0Y9I4;D6RG20;F8W8D9	P19021	Peptidyl-glycine alpha-amidating monooxygenase;Peptidylglycine alpha-hydroxylating monooxygenase;Peptidyl-alpha-hydroxyglycine alpha-amidating lyase	PAM	748	AMD_HUMAN
737619968	392140000	865820032	908289984	855190016	660209984	904160000	829409984	681070016	726899968	614899968	779779968	676190016	286670016	674849984	748249984	714489984	933020032	319080000	196210000	714630016	883520000	737720000	406740000	867729984	782249984	522609984	857670016	173860000				Arrhythmogenic right ventricular cardiomyopathy (ARVC);Cell adhesion molecules (CAMs)	20	20	26.7	26.7	26.7	99.808	0	323.31	42515000000	640	P19022;C9JMH2;A0A6Q8PF58;C9J126;C9J8J8;A0A6Q8PHJ8;A0A6Q8PG20	P19022;C9JMH2;A0A6Q8PF58;C9J126;C9J8J8	Cadherin-2	CDH2	749	C9J126_HUMAN;C9J8J8_HUMAN;C9JMH2_HUMAN;CADH2_HUMAN
596860032	460800000	208700000	405800000	367160000	821020032	509680000	323409984	995889984	353470016	747969984	1024099968	414560000	799299968	1430800000	449670016	881820032	290990016	1458400000	1339600000	223850000	263740000	1573600000	624390016	194640000	402990016	573760000	323220000	284150016					15	9	53.7	40.8	40.8	23.602	0	302.38	22926000000	366	P19652	P19652	Alpha-1-acid glycoprotein 2	ORM2	751	A1AG2_HUMAN
1160300032	522729984	845449984	311580000	367609984	439209984	335200000	390489984	265330000	505760000	438280000	250800000	539760000	652440000	443920000	381900000	327569984	457060000	306230016	595630016	307480000	580960000	730470016	887660032	421889984	761990016	422270016	535849984	1169500032					26	26	35.6	35.6	35.6	106.46	0	323.31	39586000000	592	P19823;Q5T985;Q5T987;CON__Q9TRI1	P19823;Q5T985	Inter-alpha-trypsin inhibitor heavy chain H2	ITIH2	752	ITIH2_HUMAN;Q5T985_HUMAN
434689984	260680000	351169984	132760000	156520000	224700000	196430000	218330000	179090000	270590016	215830000	183310000	240710000	392710016	221730000	134190000	187370000	217700000	237240000	317420000	136090000	257190000	309590016	393900000	151280000	324040000	207330000	227380000	672120000					22	22	31.8	31.8	31.8	101.39	0	323.31	18291000000	490	P19827;F8WAS2;H7C0N0;CON__Q0VCM5;H7C5I0	P19827;F8WAS2	Inter-alpha-trypsin inhibitor heavy chain H1	ITIH1	753	F8WAS2_HUMAN;ITIH1_HUMAN
782929984	530320000	611830016	883340032	777740032	918329984	896889984	879020032	893510016	818540032	979640000	808689984	987809984	642880000	645430016	1038899968	1133900032	761080000	423160000	255540000	774380032	768329984	809630016	527889984	777260032	649880000	944200000	1039800000	275110016					19	19	61.1	61.1	61.1	33.922	0	323.31	42063000000	370	P20774;Q5TBF5	P20774;Q5TBF5	Mimecan	OGN	756	MIME_HUMAN;Q5TBF5_HUMAN
134870000	86617000	105050000	111790000	72780000	129080000	138720000	107700000	83356000	155070000	96762000	129070000	118390000	0	57619000	105740000	100930000	120570000	0	0	115120000	133220000	125910000	51385000	114660000	106870000	91290000	140880000	61868000				Amoebiasis;ECM-receptor interaction;Focal adhesion;Protein digestion and absorption	12	12	10	10	10	183.56	0	169.6	2896800000	182	P20908;H7BY82	P20908	Collagen alpha-1(V) chain	COL5A1	757	CO5A1_HUMAN
276590016	351550016	304990016	399769984	434249984	476660000	480449984	403860000	0	289470016	395080000	0	472900000	300180000	0	406660000	436900000	530649984	0	0	280040000	520900000	246480000	0	344580000	363540000	349060000	569219968	0					7	7	38.8	38.8	38.8	27.934	0	248.21	10985000000	172	P22692	P22692	Insulin-like growth factor-binding protein 4	IGFBP4	762	IBP4_HUMAN
1211500032	1155100032	1298400000	1611800064	1326300032	1348300032	1468999936	1349600000	1376400000	1431399936	1526899968	1387100032	1345799936	1133200000	1729900032	1627800064	1911299968	1485200000	1284700032	708360000	1674599936	1354400000	1204000000	1199100032	1409400064	1356499968	1564800000	1450400000	693409984					25	9	48.9	48.9	20.8	77.213	0	323.31	126030000000	1012	P23142;CON__ENSEMBL:ENSBTAP00000016046;B1AHM7;H7C1M6;B1AHM9;B1AHM8;B1AHM6;B1AHN3;A0A0U1RRA4	P23142	Fibulin-1	FBLN1	766	FBLN1_HUMAN
169160000	445580000	278860000	440720000	870049984	422840000	621070016	617510016	505430016	428500000	508780000	480640000	604689984	268889984	465710016	524660000	359560000	0	258290000	223760000	358929984	417000000	0	453760000	437449984	0	391390016	0	0					7	7	48.8	48.8	48.8	25.322	0	207.12	7319300000	119	P24592;F8VYK9;A0A3B3IUE0;F8VVA5	P24592;F8VYK9	Insulin-like growth factor-binding protein 6	IGFBP6	772	F8VYK9_HUMAN;IBP6_HUMAN
809900032	760609984	590870016	272870016	417409984	432169984	461409984	449280000	435769984	305100000	366680000	820070016	465720000	997030016	1252499968	377520000	554110016	589110016	1271000064	695689984	318270016	423969984	783049984	930089984	338420000	583580032	563440000	361100000	867169984					14	14	48.3	48.3	48.3	34.258	0	323.31	33293000000	386	P25311;C9JEV0;H7BZJ8	P25311;C9JEV0	Zinc-alpha-2-glycoprotein	AZGP1	774	C9JEV0_HUMAN;ZA2G_HUMAN
295489984	1698000000	0	325020000	428000000	307640000	441500000	368110016	302569984	324009984	276220000	418040000	541560000	228250000	503070016	322200000	284540000	462180000	128910000	126910000	510920000	367260000	361200000	354160000	360100000	342120000	338049984	486950016	0					9	9	73.3	73.3	73.3	21.057	0	323.31	10316000000	195	P30086	P30086	Phosphatidylethanolamine-binding protein 1;Hippocampal cholinergic neurostimulating peptide	PEBP1	789	PEBP1_HUMAN
77213000	0	0	68989000	54141000	48190000	111980000	65775000	71260000	65146000	55377000	51487000	89633000	0	49495000	72373000	63443000	51664000	0	0	74309000	69849000	67869000	40184000	90988000	67599000	49496000	64395000	0				Axon guidance;Cell adhesion molecules (CAMs)	17	17	19.4	19.4	19.4	140	0	176.32	2606000000	198	P32004;E7EPI4;E7EVM4;E9PHJ4;E7EMY4;H0Y5C3	P32004	Neural cell adhesion molecule L1	L1CAM	796	L1CAM_HUMAN
1861699968	2098899968	1540499968	2323599872	2151000064	2485499904	2101600000	1875600000	2603200000	1680499968	2583600128	3031600128	1511299968	1936999936	3223800064	2158400000	2329900032	1971000064	1271699968	1229299968	2252000000	2154500096	1687000064	2036600064	1952199936	1651200000	2286899968	1980899968	702529984					25	25	65.6	65.6	65.6	46.312	0	323.31	194920000000	764	P36955;I3L4N7;I3L107;I3L4Z0;I3L4F9;I3L2R7;CON__Q95121;I3L3Z3;I3L425;I3L1U4	P36955	Pigment epithelium-derived factor	SERPINF1	806	PEDF_HUMAN
70587000	0	0	148020000	121010000	127500000	164440000	0	122290000	117860000	180860000	109390000	148350000	82978000	111100000	125380000	125430000	168160000	0	0	152430000	123550000	0	122750000	143220000	161490000	129200000	145120000	0				Protein digestion and absorption	13	13	11.4	11.4	11.4	178.19	0	113.61	2656200000	120	P39060;H7BXV5;H7C457	P39060;H7BXV5;H7C457	Collagen alpha-1(XVIII) chain;Endostatin	COL18A1	809	COIA1_HUMAN;H7BXV5_HUMAN;H7C457_HUMAN
55458000896	34544001024	86099001344	63574999040	79886999552	71794999296	78218002432	87142998016	78505000960	80131997696	64677998592	62658998272	81246003200	38945001472	77793001472	66454999040	82601000960	73209004032	41243000832	26133999616	78716002304	80464003072	76744998912	47161999360	68285001728	58353000448	70090997760	79579996160	16476000256				Arachidonic acid metabolism	13	13	72.1	72.1	72.1	21.029	0	323.31	2178500000000	959	P41222;Q5SQ11;H0Y5A1	P41222;Q5SQ11;H0Y5A1	Prostaglandin-H2 D-isomerase	PTGDS	811	H0Y5A1_HUMAN;PTGDS_HUMAN;Q5SQ11_HUMAN
93610000	55086000	79016000	116370000	96356000	111590000	98671000	101620000	88561000	50469000	91410000	71027000	103240000	70766000	100750000	96390000	100760000	68028000	65288000	55374000	100530000	64613000	117110000	85311000	72517000	75422000	47567000	65851000	68127000				Biotin metabolism;Vitamin digestion and absorption	10	10	21.7	21.7	21.7	61.132	0	288.42	3316300000	198	P43251;A0A5F9ZH80;C9JSN9;A0A5F9ZH15;A0A5F9ZH97;A0A5F9ZHE9;A0A5F9ZHR1;A0A2R8Y5J9;A0A5F9ZHF5;A0A5F9ZH57	P43251;A0A5F9ZH80;C9JSN9;A0A5F9ZH15	Biotinidase	BTD	815	BTD_HUMAN;C9JSN9_HUMAN
626940032	546550016	568800000	394870016	443910016	316760000	459400000	372409984	313790016	427560000	344020000	537960000	444160000	507230016	214630000	233240000	299980000	434769984	334649984	428040000	336390016	583169984	446060000	644110016	485600000	614480000	473830016	517710016	486860000					30	30	53.4	53.4	53.4	69.068	0	323.31	25617000000	437	P43652	P43652	Afamin	AFM	816	AFAM_HUMAN
495129984	445209984	564840000	562099968	401540000	461110016	357350016	346400000	407390016	627660032	415220000	523400000	390440000	298329984	452870016	379470016	497600000	436460000	231870000	225880000	411580000	430740000	476089984	365340000	290649984	382780000	394300000	446369984	768249984					14	14	42	42	42	38.429	0	323.31	26784000000	361	P51884;CON__Q05443	P51884	Lumican	LUM	830	LUM_HUMAN
74525000	0	98976000	235420000	224500000	236610000	326600000	235210000	211040000	234520000	131700000	96563000	254110000	6536900	218370000	182090000	166930000	298689984	100360000	18142000	244830000	273480000	179310000	48910000	278369984	169480000	159420000	282430016	7301900				Arrhythmogenic right ventricular cardiomyopathy (ARVC);Cardiac muscle contraction;Dilated cardiomyopathy;Hypertrophic cardiomyopathy (HCM);MAPK signaling pathway	37	36	40.7	40.7	40.7	124.57	0	323.31	15636000000	600	P54289;H0Y715;E7ERK3	P54289	Voltage-dependent calcium channel subunit alpha-2/delta-1;Voltage-dependent calcium channel subunit alpha-2-1;Voltage-dependent calcium channel subunit delta-1	CACNA2D1	833	CA2D1_HUMAN
485740000	784510016	718569984	877640000	623580032	911590016	894390016	810620032	1005400000	837040000	976110016	517640000	879790016	858800000	914809984	827270016	775720000	669070016	1577100032	430249984	1157299968	727470016	489350016	399620000	701840000	736680000	1037600000	1196199936	505580000				PPAR signaling pathway	16	16	35.9	35.9	35.9	54.739	0	323.31	40890000000	643	P55058	P55058	Phospholipid transfer protein	PLTP	836	PLTP_HUMAN
212440000	65240000	224810000	211320000	206240000	152880000	211820000	198790000	125930000	132100000	127420000	162460000	229750000	0	156750000	177270000	195220000	241640000	104430000	61663000	207910000	240860000	293700000	123280000	185850000	202920000	171330000	306030016	78101000				Cell adhesion molecules (CAMs)	6	6	9	9	9	100.28	0	195.34	5477700000	118	P55283;A0A087WX99;A0A0G2JRA4	P55283;A0A087WX99	Cadherin-4	CDH4	838	A0A087WX99_HUMAN;CADH4_HUMAN
481990016	344329984	551299968	1029100032	1219800064	855089984	1564400000	1187900032	1004800000	1204099968	848480000	614089984	1240999936	244200000	979249984	1078899968	938510016	1353600000	506830016	307960000	1312000000	1257200000	787539968	633569984	1323299968	728380032	771619968	1341500032	0					11	11	17.7	17.7	17.7	78.286	0	253.06	26144000000	249	P55290	P55290	Cadherin-13	CDH13	840	CAD13_HUMAN
0	216670000	0	36617000	78826000	63225000	75004000	58162000	47267000	66845000	34517000	29545000	71286000	62368000	92398000	0	73652000	72634000	0	0	0	45386000	39403000	63044000	58966000	46104000	40642000	106650000	0				Carbon fixation in photosynthetic organisms;Fructose and mannose metabolism;Glycolysis / Gluconeogenesis;Inositol phosphate metabolism	9	9	59	59	59	26.669	0	145.57	1266200000	99	P60174;U3KPZ0;U3KQF3;U3KPS5	P60174	Triosephosphate isomerase	TPI1	846	TPIS_HUMAN
0	357020000	224790000	321990016	591500032	285809984	421030016	0	385150016	295289984	361729984	525940000	521849984	600480000	662590016	444300000	344310016	0	1103399936	265820000	329649984	389100000	0	0	0	423369984	351080000	431000000	0				Salivary secretion	6	6	51.4	51.4	51.4	16.537	0	184.34	8482000000	95	P61626;F8VV32;A0A0B4J259	P61626;F8VV32;A0A0B4J259	Lysozyme C;Lysozyme	LYZ	850	A0A0B4J259_HUMAN;F8VV32_HUMAN;LYSC_HUMAN
7462900224	13267000320	4916100096	18932000768	13269999616	12720000000	7298800128	6921999872	10624000000	16334000128	8437300224	8253199872	10915999744	7428700160	9010799616	14540999680	16184000512	8050200064	6762100224	3269100032	8340800000	7918000128	5058100224	4243300096	7464000000	6145900032	8582799872	9636500480	3807600128				Antigen processing and presentation	5	5	43.7	43.7	43.7	13.714	0	323.31	279130000000	310	P61769;H0YLF3;F5H6I0	P61769;H0YLF3;F5H6I0	Beta-2-microglobulin;Beta-2-microglobulin form pI 5.3	B2M	851	B2MG_HUMAN;F5H6I0_HUMAN;H0YLF3_HUMAN
432550016	760800000	320430016	605769984	548249984	523200000	381180000	635260032	615660032	413510016	593910016	399390016	735900032	629660032	766529984	696700032	547369984	728040000	264190000	267980000	736520000	460760000	340380000	564009984	596259968	580649984	542320000	465649984	110780000				Lysosome	6	6	54.3	54.3	54.3	16.57	0	143.75	16475000000	160	P61916;J3KMY5;H0YIZ1;G3V3E8;E7EMS2;G3V3D1;G3V2V8	P61916;J3KMY5;H0YIZ1;G3V3E8;E7EMS2;G3V3D1;G3V2V8	Epididymal secretory protein E1	NPC2	852	E7EMS2_HUMAN;G3V2V8_HUMAN;G3V3D1_HUMAN;G3V3E8_HUMAN;H0YIZ1_HUMAN;J3KMY5_HUMAN;NPC2_HUMAN
725420032	4773700096	661070016	444380000	711299968	470900000	923670016	505049984	1077500032	808849984	463390016	236630000	1254400000	517689984	538790016	466960000	557500032	739009984	324220000	207700000	503480000	475040000	656800000	431350016	528529984	443190016	0	0	226840000				Regulation of actin cytoskeleton	7	6	77.3	77.3	77.3	5.0526	0	151.42	16942000000	197	P62328	P62328	Thymosin beta-4;Hematopoietic system regulatory peptide	TMSB4X	859	TYB4_HUMAN
110480000	1363500032	0	66353000	84320000	74593000	113000000	59333000	54714000	80042000	77346000	0	178140000	68138000	61573000	55258000	46095000	81140000	39963000	27603000	59168000	73438000	44289000	92864000	49528000	52038000	52584000	0	42736000					12	12	70.9	70.9	70.9	18.012	0	112.26	4965800000	160	P62937;F8WE65;C9J5S7;A0A7I2V5J5;A0A7I2V4V1;F5H284;Q9Y536;P0DN26;A0A0H2UH34;A0A0B4J2A2;A0A075B767;A0A075B759;P0DN37;E5RIZ5;A0A7P0S768	P62937;F8WE65;C9J5S7	Peptidyl-prolyl cis-trans isomerase A;Peptidyl-prolyl cis-trans isomerase A, N-terminally processed;Peptidyl-prolyl cis-trans isomerase	PPIA	863	C9J5S7_HUMAN;F8WE65_HUMAN;PPIA_HUMAN
32016000	0	0	77248000	62071000	49007000	67872000	53956000	0	64059000	40826000	36808000	72884000	0	0	61734000	59909000	64453000	34380000	0	58437000	56167000	33269000	38124000	54956000	43100000	33488000	77184000	0				Viral myocarditis	5	5	19.7	19.7	19.7	40.029	0	79.003	1395000000	110	P78310	P78310	Coxsackievirus and adenovirus receptor	CXADR	873	CXAR_HUMAN
92061000	2533100032	174930000	193330000	288900000	179830000	344630016	222450000	157970000	182660000	182170000	46988000	362600000	174310000	168370000	190940000	176650000	294580000	130070000	87413000	240770000	313400000	147660000	155390000	218900000	140550000	118680000	303440000	41045000					17	17	93	93	93	22.693	0	323.31	13318000000	331	P80723;U3KQP0	P80723	Brain acid soluble protein 1	BASP1	877	BASP1_HUMAN
318140000	618310016	486580000	591969984	616339968	474649984	643350016	426470016	420240000	382190016	468910016	410710016	740009984	81438000	311780000	491630016	425480000	623929984	213790000	222330000	667169984	639760000	412540000	248980000	563489984	393670016	367889984	620209984	142380000				ECM-receptor interaction	28	28	8.2	8.2	8.2	468.83	0	323.31	21240000000	371	P98160;A0A0U1RQT3	P98160	Basement membrane-specific heparan sulfate proteoglycan core protein;Endorepellin;LG3 peptide	HSPG2	880	PGBM_HUMAN
90112000	0	0	68382000	58849000	102450000	105190000	0	100290000	98932000	58407000	63519000	71314000	0	98675000	81621000	80071000	69902000	0	0	82429000	112050000	66286000	55886000	91413000	80416000	59053000	88774000	0					11	9	17.2	16	16	86.955	0	145.65	1681600000	99	Q06481;E9PQS3;E9PSC7	Q06481	Amyloid-like protein 2	APLP2	896	APLP2_HUMAN
739889984	381580000	756209984	1409200000	792200000	1321699968	736110016	833009984	843560000	2168999936	583289984	400129984	635350016	649590016	755550016	443790016	1392700032	800049984	424360000	318769984	928979968	812630016	611619968	526440000	748499968	631430016	805139968	927030016	362340000					21	21	40.9	40.9	40.9	65.33	0	323.31	57585000000	585	Q08380;K7EP36;K7ESM3;K7EKQ5;K7ERZ6;K7EJD3;K7ES75;K7EN99;K7EJY8;K7EQT9	Q08380	Galectin-3-binding protein	LGALS3BP	900	LG3BP_HUMAN
222100000	365009984	295489984	663640000	498240000	519369984	512420000	512680000	557440000	384380000	562209984	330700000	594440000	383340000	541790016	554470016	534360000	486390016	300980000	230510000	400200000	432169984	122420000	369600000	414670016	481200000	409640000	540769984	0					19	19	50.5	50.5	50.5	54.64	0	323.31	23236000000	472	Q12805;A0A0U1RQV3;Q580Q6;C9JQX7;C9J4J8;C9JPZ9;C9JUM4	Q12805;A0A0U1RQV3	EGF-containing fibulin-like extracellular matrix protein 1	EFEMP1	906	FBLN3_HUMAN
341329984	394820000	219370000	257520000	239350000	355800000	283529984	255810000	269740000	237860000	242610000	361769984	251460000	318129984	237190000	255600000	231640000	189060000	152280000	110960000	320220000	262950000	0	221770000	306590016	266280000	263860000	253620000	165620000					13	13	50.6	50.6	50.6	34.985	0	207.56	9425700000	193	Q12841;C9J5G4;H7C4W4	Q12841	Follistatin-related protein 1	FSTL1	907	FSTL1_HUMAN
129730000	106710000	168870000	505649984	470340000	407950016	560360000	398110016	388990016	438489984	309809984	220210000	581150016	79945000	440390016	378740000	505489984	462809984	89404000	68308000	523020000	376920000	218690000	223060000	444420000	391830016	387000000	514100000	0				Cell adhesion molecules (CAMs)	42	42	52.4	52.4	52.4	113.32	0	323.31	32408000000	805	Q12860;H0YIJ1;F8VUI9;F8VQW3;F8VX96;F8VUI8	Q12860	Contactin-1	CNTN1	908	CNTN1_HUMAN
81660000	58442000	74414000	188440000	104010000	86812000	184390000	129430000	108900000	106740000	100250000	0	153310000	0	115210000	83529000	0	124590000	67041000	0	135490000	77136000	106430000	73637000	117080000	127630000	89837000	102110000	23342000				Cell adhesion molecules (CAMs)	16	16	39.5	39.5	39.5	65.102	0	162.3	3502000000	173	Q13740;F5GXJ9;H7C543	Q13740;F5GXJ9	CD166 antigen	ALCAM	911	CD166_HUMAN;F5GXJ9_HUMAN
123840000	122040000	127260000	173800000	144710000	130200000	172100000	122670000	108490000	130530000	119980000	139910000	114150000	77097000	110570000	139740000	145790000	133720000	52225000	64912000	152070000	146320000	125740000	89596000	144890000	122510000	133400000	160250000	40877000					18	17	18.3	17.5	17.5	151.25	0	323.01	4895400000	171	Q14112;A0A087WZP6;H0YJV3	Q14112;A0A087WZP6	Nidogen-2	NID2	914	A0A087WZP6_HUMAN;NID2_HUMAN
988910016	583849984	889720000	705539968	934609984	827459968	954830016	862089984	616320000	738249984	854729984	751240000	1048300032	597000000	933820032	932579968	890739968	1172400000	424510016	255700000	1078800000	730790016	679560000	737160000	866099968	786060032	823910016	1089799936	202320000				Arrhythmogenic right ventricular cardiomyopathy (ARVC);Dilated cardiomyopathy;ECM-receptor interaction;Hypertrophic cardiomyopathy (HCM);Viral myocarditis	13	13	22.7	22.7	22.7	97.44	0	323.31	29230000000	438	Q14118;C9JEN1;C9J196;C9JQL4;C9JYS1	Q14118	Dystroglycan;Alpha-dystroglycan;Beta-dystroglycan	DAG1	915	DAG1_HUMAN
420169984	395510016	529240000	925569984	978819968	944249984	1086499968	871180032	907080000	938489984	854969984	491580000	831560000	445360000	1082700032	751360000	893779968	624600000	301860000	359049984	616670016	756009984	448180000	788550016	788569984	801500032	694700032	825360000	40171000					35	35	69	69	69	75.207	0	323.31	54755000000	839	Q14515;C9JJR8;E9PC64;F5H4Y3;D6RA29;F5H331	Q14515	SPARC-like protein 1	SPARCL1	920	SPRL1_HUMAN
411820000	407080000	442460000	560200000	626249984	606280000	725080000	667350016	296620000	733769984	613190016	339740000	901390016	365300000	417820000	567420032	647820032	673289984	192320000	111720000	779249984	538560000	678819968	76432000	506480000	567500032	404950016	643129984	209990000					19	19	67	67	67	47.972	0	323.31	19651000000	381	Q15113	Q15113	Procollagen C-endopeptidase enhancer 1	PCOLCE	928	PCOC1_HUMAN
158270000	270649984	144460000	159020000	189100000	194870000	236590000	169760000	164510000	178600000	134210000	199840000	216390000	178250000	144450000	203630000	169470000	211930000	152000000	85688000	221790000	210920000	170330000	215270000	170900000	192290000	188380000	189270000	115340000					21	21	46.3	46.3	46.3	74.68	0	323.31	7522700000	306	Q15582;H0Y8L3;H0Y9D7;S4R3C6;H0Y8M8;H0YAB8;D6RBX4;H0YAH8	Q15582;H0Y8L3	Transforming growth factor-beta-induced protein ig-h3	TGFBI	933	BGH3_HUMAN;H0Y8L3_HUMAN
442700000	236050000	159980000	856329984	529089984	509009984	456300000	272560000	876150016	629139968	403809984	269520000	266450000	617510016	802169984	364249984	702339968	295670016	137120000	171550000	550200000	316150016	165880000	601040000	352270016	518030016	508940000	363249984	0					16	16	58.2	58.2	58.2	29.13	0	323.31	18010000000	274	Q16270	Q16270	Insulin-like growth factor-binding protein 7	IGFBP7	941	IBP7_HUMAN
80084000	142870000	175910000	179100000	207820000	151490000	232220000	165890000	102700000	188960000	145930000	80900000	222360000	0	113680000	182140000	98458000	201120000	88269000	36154000	135110000	244900000	91594000	86028000	160590000	150000000	79020000	229520000	0					16	16	42.6	42.6	42.6	60.673	0	252.58	5559200000	192	Q16610	Q16610	Extracellular matrix protein 1	ECM1	944	ECM1_HUMAN
0	0	65305000	79626000	82770000	63567000	57650000	62725000	70558000	71960000	0	48963000	74429000	0	57920000	85064000	61024000	86441000	45370000	0	88167000	104820000	71631000	60360000	102460000	75025000	111890000	80594000	0					15	15	20.5	20.5	20.5	110.11	0	323.31	1685000000	119	Q24JP5;H0YFB3;H0YFQ2;F5H765;H0YFQ1	Q24JP5	Transmembrane protein 132A	TMEM132A	953	T132A_HUMAN
279740000	55643000	473049984	506750016	641870016	466360000	905939968	551929984	338940000	449289984	297489984	235630000	568249984	181550000	279950016	513700000	357840000	507340000	204020000	208780000	518769984	632380032	658200000	207370000	523569984	352609984	260380000	542120000	111120000					18	11	29.4	29.4	18	107.42	0	323.31	18252000000	357	Q53EL9;H0YF95;A0A0A0MSU7;C9JFF1;H0YGK0;K7ELJ4	Q53EL9;H0YF95;A0A0A0MSU7;C9JFF1	Seizure protein 6 homolog	SEZ6	955	A0A0A0MSU7_HUMAN;C9JFF1_HUMAN;H0YF95_HUMAN;SEZ6_HUMAN
69193000	0	116950000	216240000	202020000	184440000	252180000	206610000	197530000	224700000	125730000	76446000	188010000	0	204740000	153190000	231200000	245030000	139890000	0	216200000	238130000	81760000	75591000	208640000	168540000	212050000	277140000	31149000					3	3	15.7	15.7	15.7	34.516	0	137.16	4066700000	104	Q9NQX5;Q5SPY9	Q9NQX5;Q5SPY9	Neural proliferation differentiation and control protein 1	NPDC1	963	NPDC1_HUMAN;Q5SPY9_HUMAN
99497000	103650000	85844000	100770000	117550000	100110000	100200000	86556000	80213000	104350000	106160000	145500000	91391000	0	73216000	0	133280000	86333000	0	96298000	84374000	93401000	0	0	104940000	148940000	88977000	112640000	0					7	7	16.6	16.6	16.6	71.712	0	152.87	1921300000	102	Q6EMK4	Q6EMK4	Vasorin	VASN	972	VASN_HUMAN
0	0	0	154540000	152370000	157480000	190060000	234390000	162830000	183810000	100290000	98976000	158690000	0	136460000	173420000	180740000	182970000	0	51879000	166750000	173450000	54295000	0	105200000	113130000	100420000	133350000	0					11	11	26.3	26.3	26.3	59.582	0	83.4	3107700000	143	Q6UX71	Q6UX71	Plexin domain-containing protein 2	PLXDC2	977	PXDC2_HUMAN
121760000	0	64718000	58270000	102310000	48189000	95758000	96495000	57044000	53923000	96201000	120730000	94792000	0	41466000	94612000	41512000	100750000	38699000	0	113870000	82657000	122190000	61452000	76975000	0	54801000	84512000	0					9	9	21.7	21.7	21.7	78.989	0	101.07	2007900000	127	Q6UXK2;Q24JQ5;H3BM95;H3BM69;H3BNZ6	Q6UXK2	Immunoglobulin superfamily containing leucine-rich repeat protein 2	ISLR2	979	ISLR2_HUMAN
35549000	0	49631000	69117000	55379000	82216000	96363000	99882000	76760000	53099000	0	0	93699000	0	66782000	44889000	38467000	75981000	0	0	92981000	60077000	85893000	20714000	67097000	70151000	38978000	129470000	0					24	24	14	14	14	303.1	0	323.31	2045100000	220	Q7Z7M0;M0QZL2	Q7Z7M0	Multiple epidermal growth factor-like domains protein 8	MEGF8	987	MEGF8_HUMAN
112110000	0	117670000	117120000	180330000	95494000	101180000	134690000	119340000	75176000	114200000	86341000	136570000	0	0	171460000	118320000	0	105800000	39986000	159630000	161730000	143650000	0	205470000	135820000	96569000	175310000	52858000					5	5	21.5	21.5	21.5	38.65	0	90.401	2392100000	97	Q8NBI3	Q8NBI3	Draxin	DRAXIN	1007	DRAXI_HUMAN
100760000	122840000	119220000	110180000	117990000	78133000	91687000	143570000	96939000	119060000	114660000	58711000	144420000	59038000	144370000	123100000	134520000	133380000	54776000	55369000	135970000	114950000	128230000	93446000	93324000	133820000	114170000	131100000	0					8	8	30.2	30.2	30.2	42.785	0	246.13	4006900000	155	Q8NFZ8	Q8NFZ8	Cell adhesion molecule 4	CADM4	1018	CADM4_HUMAN
737859968	926729984	1116300032	1415800064	1247399936	884060032	1112400000	1067600000	1571399936	942350016	1117900032	1834700032	954140032	738249984	1936600064	918550016	1480400000	1333799936	397809984	721569984	967240000	851859968	1061600000	1678300032	1107200000	1072899968	1370099968	1014000000	430000000					25	25	53.3	53.3	53.3	63.941	0	323.31	56857000000	676	Q8TEU8;C9J6G4;Q96NZ8	Q8TEU8;C9J6G4	WAP, Kazal, immunoglobulin, Kunitz and NTR domain-containing protein 2	WFIKKN2	1021	C9J6G4_HUMAN;WFKN2_HUMAN
86006000	0	82938000	173200000	135510000	105920000	0	62637000	80774000	74277000	68147000	72974000	83906000	0	71015000	105810000	101970000	83114000	56817000	33098000	102500000	72534000	127430000	67885000	68160000	78115000	108580000	69585000	0					11	11	64.4	64.4	64.4	29.005	0	323.31	2212700000	117	Q8WX77	Q8WX77	Insulin-like growth factor-binding protein-like 1	IGFBPL1	1023	IBPL1_HUMAN
388489984	311060000	307100000	893430016	899600000	885400000	874809984	828270016	957409984	924110016	602329984	521350016	854470016	237790000	851500032	852200000	778140032	797369984	400400000	248430000	943449984	637809984	410800000	334409984	864270016	1075200000	875150016	839190016	77651000					30	30	65	65	65	53.005	0	323.31	40180000000	694	Q8WXD2;H0YKC2	Q8WXD2	Secretogranin-3	SCG3	1024	SCG3_HUMAN
1662800000	951230016	2674400000	4946899968	5194999808	4244999936	5635700224	4956800000	3263000064	4478900224	3575500032	2415899904	5476100096	1249299968	4740299776	4360500224	3603899904	4515599872	1845900032	1145900032	4284999936	5274899968	2406299904	1841200000	4627299840	4316100096	4014299904	5827800064	819710016					15	7	73.6	73.6	34.4	24.68	0	323.31	151040000000	483	Q92520	Q92520	Protein FAM3C	FAM3C	1027	FAM3C_HUMAN
226910000	89679000	230740000	224480000	201490000	158470000	282969984	201910000	142730000	152780000	172810000	171280000	270289984	32188000	211950000	193710000	150420000	243340000	82210000	14382000	218280000	219800000	297820000	97187000	239510000	221030000	126960000	229000000	0				Cell adhesion molecules (CAMs)	30	30	29	29	29	160.01	0	323.31	11140000000	401	Q92859;Q59FP8	Q92859;Q59FP8	Neogenin	NEO1	1032	NEO1_HUMAN;Q59FP8_HUMAN
114710000	0	0	717070016	311540000	545219968	453520000	377740000	452100000	393300000	507040000	134530000	464160000	199080000	559089984	445880000	358300000	389060000	31222000	60954000	288609984	315489984	79966000	230100000	380449984	342990016	371830016	481409984	0					11	11	62.7	62.7	62.7	26.855	0	320.23	13958000000	251	Q92876	Q92876	Kallikrein-6	KLK6	1033	KLK6_HUMAN
0	172310000	193000000	380440000	371560000	367480000	334849984	337760000	297040000	218120000	234530000	0	390409984	183030000	0	470300000	221380000	379600000	277060000	0	341240000	491800000	251020000	269649984	371220000	247030000	247150000	420140000	0					5	5	20.9	20.9	20.9	28.248	0	162.89	5659300000	90	Q96FE7;C9JMK5	Q96FE7;C9JMK5	Phosphoinositide-3-kinase-interacting protein 1	PIK3IP1	1038	C9JMK5_HUMAN;P3IP1_HUMAN
1360099968	330710016	1197699968	1413400064	865080000	1063800000	1027600000	1015800000	1226099968	837990016	1346099968	1358800000	1153200000	410750016	1390300032	1188600064	1258800000	1338099968	81579000	64433000	1461400064	703160000	1355299968	856400000	1778599936	1037500032	848819968	1048099968	140950000					23	22	38.4	37.7	37.7	99.117	0	323.31	33346000000	424	Q96GW7;Q5T3I6;Q5T3I7;V9GY88;Q5T3I8	Q96GW7	Brevican core protein	BCAN	1041	PGCB_HUMAN
276390016	0	292430016	324480000	294089984	212970000	348350016	353560000	269500000	236790000	216320000	386689984	234820000	0	0	279849984	290729984	321700000	0	0	326849984	377150016	271870016	155000000	389780000	0	179620000	263930000	0				N-Glycan biosynthesis;Other types of O-glycan biosynthesis	6	6	10.4	10.4	10.4	60.157	0	70.662	5219500000	82	Q96JF0	Q96JF0	Beta-galactoside alpha-2,6-sialyltransferase 2	ST6GAL2	1044	SIAT2_HUMAN
328720000	272750016	197720000	168840000	129560000	206080000	100610000	160640000	150360000	200770000	188670000	222710000	148450000	305300000	240970000	119080000	164060000	214770000	244560000	175010000	110480000	171380000	129260000	276070016	180330000	219160000	153650000	157580000	157930000					16	16	45.8	45.8	45.8	62.216	0	323.31	7365700000	356	Q96PD5;M0R2W8;CON__ENSEMBL:ENSBTAP00000016285;M0QYW3	Q96PD5	N-acetylmuramoyl-L-alanine amidase	PGLYRP2	1047	PGRP2_HUMAN
1292099968	308060000	1664999936	1417100032	1719299968	1471800064	2419599872	1620499968	948230016	1396499968	1068300032	1102300032	1688400000	310129984	1107699968	1820400000	1278800000	2099900032	791030016	282049984	1792800000	1924800000	2390000128	547800000	1712099968	1361100032	853720000	1834300032	317030016					36	36	59.6	59.6	59.6	91.346	0	323.31	135580000000	1156	Q99435;F8VVB6;F8W1A2;H0YI34;F8VZ72;F8VRQ0;F8VXR5;H0YIT4;H0YHY5	Q99435;F8VVB6	Protein kinase C-binding protein NELL2	NELL2	1050	F8VVB6_HUMAN;NELL2_HUMAN
67320000	97539000	145720000	85697000	0	102980000	97213000	79033000	105710000	75560000	77923000	61685000	0	0	140000000	105080000	145170000	96725000	0	0	87437000	81969000	0	68198000	70647000	83812000	133540000	98510000	0					3	3	21.5	21.5	21.5	18.617	0	63.046	1660200000	79	Q99969;C9J8S2	Q99969;C9J8S2	Retinoic acid receptor responder protein 2	RARRES2	1054	C9J8S2_HUMAN;RARR2_HUMAN
148650000	190110000	147260000	582990016	503820000	371609984	582520000	611750016	525449984	409220000	403590016	0	534990016	119710000	515500000	508040000	419729984	468249984	216050000	0	550240000	413529984	151290000	251390000	509120000	382360000	411960000	465849984	0					12	2	39.2	39.2	8.1	37.971	0	323.31	14408000000	225	Q9P121;F8VTR5;C9JK95	Q9P121;F8VTR5	Neurotrimin	NTM	1103	F8VTR5_HUMAN;NTRI_HUMAN
920710016	551670016	1276499968	1917600000	1980199936	1790200064	2116099968	1599800064	1598000000	1468600064	1356600064	754350016	1865799936	753489984	1408600064	1770899968	1575299968	1672000000	1038800000	539180032	2019900032	1845699968	895980032	887550016	1188600064	1512600064	1098599936	1497299968	542249984					10	9	58.5	58.5	55.8	27.372	0	323.31	70020000000	433	Q9UHG2	Q9UHG2	ProSAAS;KEP;Big SAAS;Little SAAS;Big PEN-LEN;PEN;Little LEN;Big LEN	PCSK1N	1112	PCSK1_HUMAN
30094000	604129984	12870000	433609984	183100000	49953000	296480000	117970000	143230000	22400000	135190000	94741000	234360000	253850000	1984400	554800000	224850000	9117400	6842500096	98891000	356280000	43565000	30516000	222670000	79966000	173890000	112260000	174240000	12162000					102	102	43.2	43.2	43.2	572.01	0	323.31	41593000000	880	Q9Y6R7;A0A087WXI2;A0A087WUZ2	Q9Y6R7;A0A087WXI2	IgGFc-binding protein	FCGBP	1129	A0A087WXI2_HUMAN;FCGBP_HUMAN
